# Supplementary material for: Log-based software monitoring: a systematic mapping study
Source: PeerJ Comput Sci. 2021 May 6;7:e489. doi: 10.7717/peerj-cs.489 (PMC8114802; doi:10.7717/peerj-cs.489)
Supplement: Supplemental Information 1 — Each row indicates a primary study that includes the respective metadata, extracted information, and classification. [file peerj-cs-07-489-s001.csv]

spreadsheet available for visualization at https://docs.google.com/spreadsheets/d/e/2PACX-1vRg5WNl3PYbJPemzM1AtHvBqhI-iufeTO7t0aDadNGxb0NiBqmwULZlUir4vpS3c7R9dfi9j3THl0k0/pubhtml?gid=516629492&single=true														bibref	What's the Distribution of Research Effort per Dimension? (Mapping Study)
															LOG ENGINEERING = 24			LOG INFRASTRUCTURE = 16		LOG ANALYSIS = 68
Demographics										Structured Abstract					8	5	11	13	3	20	9	6	6	4	10	6	7
Venue	Acron.	Year	Type	Topic	Rank	Link	Authors	Paper title	Abstract	WHAT (is this about, after all)?	WHY (are the authors motivated by the "what")?	HOW (do the authors support the "what" question)?	CONCLUSION (based on the experiments was...)?	bibref	Practices	Requirements	Implementation	Parsing	Storage	Anomaly Detection	Security & Privacy	Root Cause Analysis	Failure Prediction	Quality Assurance	Model Inf. & Invariant Mining	Reliability & Dependability	Log Platforms
International Symposium on Software Reliability Engineering	ISSRE	1992	research track paper	Computer Software	A	https://ieeexplore.ieee.org/document/285886/	Dong Tang , R.K. Iyer	Analysis of the VAX/VMS error logs in multicomputer environments-a case study of software dependability	An analysis is given of the software error logs produced by the VAX/VMS operating system from two VAXcluster multicomputer environments. Basic error characteristics are identified by statistical analysis. Correlations between software and hardware errors, and among software errors on different machines are investigated. Finally, reward analysis and reliability growth analysis are performed to eva…	An analysis is given of the software error logs produced by the VAX/VMS operating system from two VAXcluster multicomputer environments.		Basic error characteristics are identified by statistical analysis. Correlations between software and hardware errors, and among software errors on different machines are investigated. Finally, reward analysis and reliability growth analysis are performed to evaluate software dependability.	Results show that major software problems in the measured systems are from program flow control and I/O management. The network-related software is suspected to be a reliability bottleneck. It is shown that a multicomputer software 'time between error' distribution can be modeled by a 2-phase hyperexponential random variable: a lower error rate pattern which characterizes regular errors, and a hi…	Tang_1992						1
International Conference on Intelligence in Communication Systems		2004	16/1		?	https://link.springer.com/chapter/10.1007/978-3-540-30179-0_27	Risto Vaarandi	A breadth-first algorithm for mining frequent patterns from event logs
International Conference on Automated Software Engineering	ASE	1998	research track paper	Computer Software	A	https://ieeexplore.ieee.org/document/732614/	J.H. Andrews	Testing using log file analysis: tools, methods, and issues	Large software systems often keep log files of events. Such log files can be analyzed to check whether a run of a program reveals faults in the system. We discuss how such log files can be used in software testing. We present a framework for automatically analyzing log files, and describe a language for specifying analyzer programs and an implementation of that language. The language permits comp…	We discuss how such log files can be used in software testing. We present a framework for automatically analyzing log files, and describe a language for specifying analyzer programs and an implementation of that language.	Large software systems often keep log files of events. Such log files can be analyzed to check whether a run of a program reveals faults in the system.		We conclude that testing using log file analysis constitutes a useful methodology for software verification, somewhere between current testing practice and formal verification methodologies.	Andrews_1998										1
International Conference on Computer Communication and Informatics		2015	6/2		?	https://ieeexplore.ieee.org/document/7218075/	Amit Aeri , Shyam Tukadiya	A comparative study of network based system log management tools
Global Trends in Computing and Communication Systems		2012	10/1		?	http://link.springer.com/chapter/10.1007/978-3-642-29219-4_47	G.Sudhamathy, B. Sarojini Illango, C. Jothi Venkateswaran	A Comparative Study on Web Log Clustering Approaches
International Journal of Computer Science and Applications		2009	journal		?	https://www.scopus.com/inward/record.url?eid=2-s2.0-67650473447&partnerID=40&md5=cb48baedb7508b176daba2beff1b3698	Ra, I., Park, T.-K.	A forensic logging system based on a secure os
IEEE/IFIP International Conference on Dependable Systems	DSN	2007	research track paper	Computer Software	A	https://ieeexplore.ieee.org/abstract/document/4273008/	Adam Oliner , Jon Stearley	What supercomputers say: A study of five system logs	If we hope to automatically detect and diagnose failures in large-scale computer systems, we must study real deployed systems and the data they generate. Progress has been hampered by the inaccessibility of empirical data. This paper addresses that dearth by examining system logs from five supercomputers, with the aim of providing useful insight and direction for future research into the use of s…	This paper addresses that dearth by examining system logs from five supercomputers, with the aim of providing useful insight and direction for future research into the use of such logs.	If we hope to automatically detect and diagnose failures in large-scale computer systems, we must study real deployed systems and the data they generate. Progress has been hampered by the inaccessibility of empirical data.	We present details about the systems, methods of log collection, and how alerts were identified; propose a simpler and more effective filtering algorithm; and define operational context to encompass the crucial information that we found to be currently missing from most logs. The machines we consider (and the number of processors) are: Blue Gene/L (131072), Red Storm (10880), Thunderbird (9024), …		Oliner_2007						1
Knowledge and Information Systems		2001	journal	Information Systems Business and Management	B	https://link.springer.com/article/10.1007/PL00011675	Mehmet Sayal, Peter Scheuermann	Distributed web log mining using maximal large itemsets
International Conference on Information Visualisation	IV	2002	research track paper	Artificial Intelligence and Image Processing Design Practice and Management	B	https://ieeexplore.ieee.org/document/1028831/	T. Takada , H. Koike	Tudumi: information visualization system for monitoring and auditing computer logs
Annual Computer Security Applications Conference	ACSAC	2003	research track paper	Computer Software	A	https://ieeexplore.ieee.org/document/1254330/	C. Abad , J. Taylor , C. Sengul , W. Yurcik , Y. Zhou , K. Rowe	Log correlation for intrusion detection: a proof of concept	Intrusion detection is an important part of networked-systems security protection. Although commercial products exist, finding intrusions has proven to be a difficult task with limitations under current techniques. Therefore, improved techniques are needed. We argue the need for correlating data among different logs to improve intrusion detection systems accuracy. We show how different attacks ar…	We argue the need for correlating data among different logs to improve intrusion detection systems accuracy.	Intrusion detection is an important part of networked-systems security protection. Although commercial products exist, finding intrusions has proven to be a difficult task with limitations under current techniques. Therefore, improved techniques are needed.	We show how different attacks are reflected in different logs and argue that some attacks are not evident when a single log is analyzed. We present experimental results using anomaly detection for the virus Yaha.	Through the use of data mining tools (RIPPER) and correlation among logs we improve the effectiveness of an intrusion detection system while reducing false positives.	Abad_2003							1
Hawaii International Conference on System Sciences	HICSS	2003	research track paper	Information Systems	A	https://ieeexplore.ieee.org/document/1174915/	A. Ulrich , H. Hallal , A. Petrenko , S. Boroday	Verifying trustworthiness requirements in distributed systems with formal log-file analysis	The paper reports on an analysis technology based on the tracing approach to test trustworthy requirements of a distributed system. The system under test is instrumented such that it generates events at runtime to enable reasoning about the implementation of these requirements in a later step. Specifically, an event log collected during a system run is converted into a specification of the system…	The paper reports on an analysis technology based on the tracing approach to test trustworthy requirements of a distributed system		The system under test is instrumented such that it generates events at runtime to enable reasoning about the implementation of these requirements in a later step. Specifically, an event log collected during a system run is converted into a specification of the system. The (trustworthy) requirements of the system must be formally specified by an expert who has sufficient knowledge about the behavi…		Ulrich_2003											1
International Conference on Dependability		2009	research track paper		?	https://ieeexplore.ieee.org/document/5211082/	M. Cinque , D. Cotroneo , A. Pecchia	A Logging Approach for Effective Dependability Evaluation of Complex Systems
Data Warehousing and Knowledge Discovery	DaWaK	2003	research track paper	Data Format	B	http://link.springer.com/chapter/10.1007/978-3-540-45228-7_36	Kimmo Hätönen, Jean François Boulicaut, Mika Klemettinen, Markus Miettinen, Cyrille Masson	Comprehensive Log Compression with Frequent Patterns
Intelligent Data Analysis		2003	journal	Artificial Intelligence and Image Processing Data Format Cognitive Science	B	https://content.iospress.com/articles/intelligent-data-analysis/ida00122	Pabarskaite, Zidrina	Decision trees for web log mining
IEEE Transactions on Software Engineering	TSE	2003	journal	Computer Software Information Systems	A*	https://ieeexplore.ieee.org/document/1214327/	J.H. Andrews , Yingjun Zhang	General test result checking with log file analysis	We describe and apply a lightweight formal method for checking test results. The method assumes that the software under test writes a text log file; this log file is then analyzed by a program to see if it reveals failures. We suggest a state-machine-based formalism for specifying the log file analyzer programs and describe a language and implementation based on that formalism. We report on empir…	We describe and apply a lightweight formal method for checking test results.		The method assumes that the software under test writes a text log file; this log file is then analyzed by a program to see if it reveals failures. We suggest a state-machine-based formalism for specifying the log file analyzer programs and describe a language and implementation based on that formalism. We report on empirical studies of the application of log file analysis to random testing of uni…	The experiments suggest that writing a formal log file analyzer and using random testing is competitive with other formal and informal methods for unit testing.	Andrews_2003										1
Journal of Computer Science		2011	journal		?	http://citeseerx.ist.psu.edu/viewdoc/summary?doi=10.1.1.676.671	J. Vellingiri , S. Chenthur P	A Novel Technique for Web Log mining with Better Data Cleaning and Transaction Identification
Annual Computer Security Applications Conference	ACSAC	2004	research track paper	Computer Software	A	https://ieeexplore.ieee.org/document/1377226/	E.L. Barse , E. Jonsson	Extracting attack manifestations to determine log data requirements for intrusion detection	Log data adapted for intrusion detection is a little explored research issue despite its importance for successful and efficient detection of attacks and intrusions. This paper presents a starting point in the search for suitable log data by providing a framework for determining exactly which log data that can reveal a specific attack, i.e. the attack manifestations. An attack manifestation consi…	This paper presents a starting point in the search for suitable log data by providing a framework for determining exactly which log data that can reveal a specific attack, i.e. the attack manifestations.	Log data adapted for intrusion detection is a little explored research issue despite its importance for successful and efficient detection of attacks and intrusions.	An attack manifestation consists of the log entries added, changed or removed by the attack compared to normal behaviour. We demonstrate the use of the framework by studying attacks in different types of log data. This work provides a foundation for a fully automated attack analysis. It also provides some pointers for how to define a collection of log elements that are both sufficient and necessa…	We believe that this lead to a log data source that is especially adapted for intrusion detection purposes.	Barse_2004							1
IEEE International Conference on Web Services	ICWS	2004	research track paper	Information Systems	A	https://ieeexplore.ieee.org/document/1314724/	S.M.S. da Cruz , M.L.M. Campos , P.F. Pires , L.M. Campos	Monitoring e-business Web services usage through a log based architecture	The emergence of Web services represents a significant advance in the continuing evolution of e-business. In order to fully explore business opportunities provided by this paradigm, it is important to track its utilization. This can be done through the use of logging facilities. However, current Web logging approaches do not contemplate Web services utilization. This paper presents a Web services…	This paper presents a Web services logging architecture based on SOAP intermediaries that captures comprehensive services usage information, which can be explored to improve B2B and B2C transactions by providing feedback on customer electronic behavior.	The emergence of Web services represents a significant advance in the continuing evolution of e-business. In order to fully explore business opportunities provided by this paradigm, it is important to track its utilization. This can be done through the use of logging facilities. However, current Web logging approaches do not contemplate Web services utilization.			Cruz_2004		1
Asia Joint Conference on Information Security		2017	7/2		?	https://ieeexplore.ieee.org/document/8026037/	Mamoru Mimura , Yuhei Otsubo , Hidehiko Tanaka , Hidema Tanaka	A Practical Experiment of the HTTP-Based RAT Detection Method in Proxy Server Logs
IEEE Transactions on Software Engineering	TSE	2004	journal	Computer Software Information Systems	A*	https://ieeexplore.ieee.org/document/1359769/	J. Tian , S. Rudraraju , Zhao Li	Evaluating Web software reliability based on workload and failure data extracted from server logs	We characterize usage and problems for Web applications, evaluate their reliability, and examine the potential for reliability improvement. Based on the characteristics of Web applications and the overall Web environment, we classify Web problems and focus on the subset of source content problems. Using information about Web accesses, we derive various measurements that can characterize Web site …	We characterize usage and problems for Web applications, evaluate their reliability, and examine the potential for reliability improvement.		Based on the characteristics of Web applications and the overall Web environment, we classify Web problems and focus on the subset of source content problems. Using information about Web accesses, we derive various measurements that can characterize Web site workload at different levels of granularity and from different perspectives. These workload measurements, together with failure information …	The results demonstrated the viability and effectiveness of our approach.	Tian_2004												1
Large Installation System Administration Conference	LISA	1998			?	http://static.usenix.org/events/lisa98/full_papers/girardin/girardin.pdf	Luc Girardin, Dominique Brodbeck	A Visual Approach for Monitoring Logs.
International Conference on Parallel and Distributed Processing Techniques and Applications	PDPTA	2005	7/2	Distributed Computing	B	https://www.scopus.com/inward/record.url?eid=2-s2.0-33645759565&partnerID=40&md5=851dd9cc3d4f5187b6efd70462234c38	Paniagua, C., Xhafa, F., Caballé, S., Daradoumis, T.	A parallel grid-based implementation for real time processing of event log data in collaborative applications
IEEE International Symposium on Cluster, Cloud and Grid Computing	CCGrid	2005	research track paper	Distributed Computing	A	https://ieeexplore.ieee.org/document/1558544/	J.E. Prewett	Incorporating information from a cluster batch scheduler and center management software into automated log file analysis	Cluster style architectures are becoming increasingly important in the computing world. These machines have been the target of several recent attacks. In this paper, we examine how the unique characteristics of these machines, including how they are generally operated in the larger context of a computing center, can be leveraged to provide better security for these machines. We examine this by in…	In this paper, we examine how the unique characteristics of these machines, including how they are generally operated in the larger context of a computing center, can be leveraged to provide better security for these machines.	Cluster style architectures are becoming increasingly important in the computing world. These machines have been the target of several recent attacks.	We examine this by incorporating data from a batch scheduler and a user database to augment our automated log analysis using the freely available log analysis tool LoGS.		Prewett_2005							1
International Workshop on Document Analysis Systems	DAS	2006	research track paper	Artificial Intelligence and Image Processing	B	http://link.springer.com/chapter/10.1007/11669487_26	Michael Flaster, Bruce Hillyer, Tin Kam Ho	Exploratory Analysis System for Semi-structured Engineering Logs
International Conference on Information Systems Security and Privacy		2018	12/2		?	https://www.scopus.com/inward/record.url?eid=2-s2.0-85050163209&partnerID=40&md5=e2a1b801179ec3676a0f4440e22ebb2e	Wurzenberger M., Skopik F., Settanni G., Fiedler R.	AECID: A Self-learning Anomaly Detection Approach based on Light-weight Log Parser Models
SecureComm and Workshops	SecureComm	2006	research track paper	Computer Software	B	https://ieeexplore.ieee.org/document/4198837/	Jianqing Zhang , Nikita Borisov , William Yurcik	Outsourcing Security Analysis with Anonymized Logs
International Conference on Very Large Data Bases	VLDB	2006	industry track paper	Data Format	A*	https://dl.acm.org/citation.cfm?id=1164221	Mirko Steinle, Karl Aberer, Sarunas Girdzijauskas, Christian Lovis	Mapping moving landscapes by mining mountains of logs: novel techniques for dependency model generation	Problem diagnosis for distributed systems is usually difficult. Thus, an automated support is needed to identify root causes of encountered problems such as performance lags or inadequate functioning quickly. The many tools and techniques existing today that perform this task rely usually on some dependency model of the system. However, in complex and fast evolving environments it is practically …	In this paper, we propose three different approaches to discover dependencies by mining system logs.	Problem diagnosis for distributed systems is usually difficult. Thus, an automated support is needed to identify root causes of encountered problems such as performance lags or inadequate functioning quickly. The many tools and techniques existing today that perform this task rely usually on some dependency model of the system. However, in complex and fast evolving environments it is practically …	Our work is inspired by a recently developed data mining algorithm and techniques for collocation extraction from the natural language processing field. We evaluate the techniques in a case study for Geneva University Hospitals (HUG) and perform large-scale experiments on production data.	Results show that all techniques are capable of finding useful dependency information with reasonable precision in a real-world environment.	Steinle_2006											1
Asian Internet Engineering Conference		2017	8/2		?	https://dl.acm.org/citation.cfm?id=3154973	Kazuki Otomo, Satoru Kobayashi, Kensuke Fukuda, Hiroshi Esaki	An Analysis of Burstiness and Causality of System Logs
International Conference on Green Computing and Communications and International Conference on Cyber, Physical and Social Computing		2010	8/2		?	https://ieeexplore.ieee.org/document/5724812/	Marcos Dias de Assuncao , Anne-Cecile Orgerie , Laurent Lefevre	An Analysis of Power Consumption Logs from a Monitored Grid Site
International Conferences on Big Data and Cloud Computing		2016			?	https://ieeexplore.ieee.org/document/7723745/	Wei Peng , Yongjiang Li , Bing Li , Xiangyuan Zhu	An Analysis Platform of Road Traffic Management System Log Data Based on Distributed Storage and Parallel Computing Techniques
ICIC Express Letters		2018	8/1		?	https://www.scopus.com/inward/record.url?eid=2-s2.0-85053260742&partnerID=40&md5=780576d4a61cc857c5cf084a17f8cf6d	Wongthai W., van Moorsel A.	An approach to defining and identifying logging system patterns for infrastructure as a service cloud
International Journal of Computer Applications	IJCA	2010	journal		?	http://citeseerx.ist.psu.edu/viewdoc/download?doi=10.1.1.206.4736&rep=rep1&type=pdf	Nikhil Kumar Singh, Deepak Singh Tomar, Bhola Nath Roy	An approach to understand the end user behavior through log analysis
International Journal on Artificial Intelligence Tools		2006			C	https://www.scopus.com/inward/record.url?eid=2-s2.0-33750145053&partnerID=40&md5=31613bf8925628a272aef37b4926c4ff	Adeva, J.J.G., Atxa, J.M.P.	Web misuse detection through text categorisation of application server logs
IEEE/WIC/ACM International Joint Conferences on Web Inteligence and Intelligent Agent Technology	WI-IAT	2007	research track paper	Artificial Intelligence and Image Processing	B	https://www.scopus.com/inward/record.url?eid=2-s2.0-38949091064&partnerID=40&md5=474fefcb92ec005d6d158486cb94e1fb	Unruh, A., Bailey, J., Ramamohanarao, K.	A logging-based approach for building more robust multi-agent systems
International Conference on Fuzzy Systems and Knowledge Discovery	FSKD	2007	7/2	Artificial Intelligence and Image Processing	C	https://ieeexplore.ieee.org/document/4406215/	Sen Guo , Yongsheng Liang , Zhili Zhang , Wei Liu	Association Rule Retrieved from Web Log Based on Rough Set Theory
IEEE International Parallel and Distributed Processing Symposium	IPDPS	2007	research track paper	Distributed Computing	A	https://ieeexplore.ieee.org/document/4228363/	Yinglung Liang , Yanyong Zhang , Hui Xiong , Ramendra Sahoo	An Adaptive Semantic Filter for Blue Gene/L Failure Log Analysis	Frequent failure occurrences are becoming a serious concern to the community of high-end computing, especially when the applications and the underlying systems rapidly grow in size and complexity. In order to better understand the failure behavior of such systems and further develop effective fault-tolerant strategies, we have collected detailed event logs from IBM Blue Gene/L, which has as many …	This paper thus fills this crucial void by designing and developing an adaptive semantic filtering (ASF) method, which is accurate, light-weight, and more importantly, easy to automate.	Due to the scale of such machines and the granularity of the logging mechanisms, the logs can get voluminous and usually contain records which may not all be distinct. Consequently, it is crucial to filter these logs towards isolating the specific failures, which can then be useful for subsequent analysis. However, existing filtering methods either require too much domain expertise, or produce er…	Specifically, ASF exploits the semantic correlation between two events, and dynamically adapts the correlation threshold based on the temporal gap between the events. We have validated the ASF method using the failure logs collected from Blue Gene/L over a period of 98 days.	Our experimental results show that ASF can effectively remove redundant entries in the logs, and the filtering results can serve as a good base for future failure analysis studies.	Liang_2007				1
International Conference on Computational Intelligence and Communication Networks		2014	7/2		?	https://ieeexplore.ieee.org/document/7065584/	Sheetal Sahu , Praneet Saurabh , Sandeep Rai	An Enhancement in Clustering for Sequential Pattern Mining through Neural Algorithm Using Web Logs
Seventh International Conference on the Quantitative Evaluation of Systems		2010			?	https://ieeexplore.ieee.org/document/5600405/	Adetokunbo Makanju , A. Nur Zincir-Heywood , Evangelos E. Milios	An Evaluation of Entropy Based Approaches to Alert Detection in High Performance Cluster Logs
IEEE/ACM International Conference on Grid Computing	GRID	2007	research track paper	Distributed Computing	A	https://ieeexplore.ieee.org/document/4354137/	Dan Gunter , Brian L. Tierney , Aaron Brown , Martin Swany , John Bresnahan , Jennifer M. Schopf	Log summarization and anomaly detection for troubleshooting distributed systems	Today's system monitoring tools are capable of detecting system failures such as host failures, OS errors, and network partitions in near-real time. Unfortunately, the same cannot yet be said of the end-to-end distributed software stack. Any given action, for example, reliably transferring a directory of files, can involve a wide range of complex and interrelated actions across multiple pieces of…	We present an infrastructure for troubleshooting complex middleware, a general purpose technique for configurable log summarization, and an anomaly detection technique that works in near-real time on running Grid middleware.	Today's system monitoring tools are capable of detecting system failures such as host failures, OS errors, and network partitions in near-real time. Unfortunately, the same cannot yet be said of the end-to-end distributed software stack. Any given action, for example, reliably transferring a directory of files, can involve a wide range of complex and interrelated actions across multiple pieces of…	We present results gathered using this infrastructure from instrumented Grid middleware and applications running on the Emulab testbed.	From these results, we analyze the effectiveness of several algorithms at accurately detecting a variety of performance anomalies.	Gunter_2007													1
International Conference on Secure Software Integration and Reliability Improvement		2010	10/2		?	https://ieeexplore.ieee.org/document/5502846/	Zhen Ming Jiang , Alberto Avritzer , Emad Shihab , Ahmed E. Hassan , Parminder Flora	An Industrial Case Study on Speeding Up User Acceptance Testing by Mining Execution Logs
IEEE Access		2018	journal		?	https://ieeexplore.ieee.org/document/8371223/	Zhaoli Liu , Tao Qin , Xiaohong Guan , Hezhi Jiang , Chenxu Wang	An Integrated Method for Anomaly Detection From Massive System Logs	Logs are generated by systems to record the detailed runtime information about system operations, and log analysis plays an important role in anomaly detection at the host or network level. Most existing detection methods require a priori knowledge, which cannot be used to detect the new or unknown anomalies. Moreover, the growing volume of logs poses new challenges to anomaly detection. In this …
Turkish Journal of Electrical Engineering and Computer Sciences		2016	journal		?	https://www.scopus.com/inward/record.url?eid=2-s2.0-84963876682&partnerID=40&md5=3f9440c7a1e2e5f91b4fba7c863d83a7	Hajamydeen, A.I., Udzir, N.I., Mahmod, R., Abdul Ghani, A.A.	An unsupervised heterogeneous log-based framework for anomaly detection
International Conference on Software and Information Engineering		2018	research track paper		?	https://dl.acm.org/citation.cfm?id=3220269	Marlina Abdul Latib, Saiful Adli Ismail, Othman Mohd Yusop, Pritheega Magalingam, Azri Azmi	Analysing Log Files For Web Intrusion Investigation Using Hadoop
Conference on Emerging Technologies and Factory Automation		2010	8/2		?	https://ieeexplore.ieee.org/document/5641202/	Volodymyr Vasyutynskyy , Andre Gellrich , Klaus Kabitzsch , David Wustmann	Analysis of internal logistic systems based on event logs
American Control Conference		2011	6/2		?	https://ieeexplore.ieee.org/document/5989966/	Changyan Zhou , Ratnesh Kumar , Shengbing Jiang	Analysis of runtime data-log for software fault localization
Information Sciences		2007	journal	Library and Information Studies Information Systems	B	https://www.sciencedirect.com/science/article/pii/S0020025508001886	Pekka Kumpulainen, Kimmo Hätönen	Local anomaly detection for network system log monitoring
IEEE/IFIP International Conference on Dependable Systems	DSN	2008	industry track paper	Computer Software	A	https://ieeexplore.ieee.org/document/4630109/	Chinghway Lim , Navjot Singh , Shalini Yajnik	A log mining approach to failure analysis of enterprise telephony systems	Log monitoring techniques to characterize system and user behavior have gained significant popularity. Some common applications of study of systems logs are syslog mining to detect and predict system failure behavior, Web log mining to characterize Web usage patterns, and error/debug log analysis for detecting anomalies. In this paper, we discuss our experiences with applying log mining technique…	In this paper, we discuss our experiences with applying log mining techniques to characterize the behavior of large enterprise telephony systems.	Log monitoring techniques to characterize system and user behavior have gained significant popularity. Some common applications of study of systems logs are syslog mining to detect and predict system failure behavior, Web log mining to characterize Web usage patterns, and error/debug log analysis for detecting anomalies	We describe the problems encountered in the study of such logs and propose some solutions. The key differentiator of our solutions is the use of individual message frequencies to characterize system behavior and the ability to incorporate domain-specific knowledge through user feedback.	The techniques that we propose are general enough to be applicable to other systems logs and can easily be packaged into automated tools for log analysis.	Lim_2008						1
Large Installation System Administration Conference	LISA	2014			?	https://www.usenix.org/system/files/conference/lisa14/lisa14-paper-alspaugh.pdf	S. Alspaugh, Beidi Chen, Jessica Lin, Archana Ganapathi, Marti A. Hearst, Randy Katz	Analyzing Log Analysis: An Empirical Study of User Log Mining.
Transactions on Systems, Man, and Cybernetics, Part C		2012	journal		?	https://ieeexplore.ieee.org/document/6392466/	Karen A. Garcia , Raúl Monroy , Luis A. Trejo , Carlos Mex-Perera , Eduardo Aguirre	Analyzing Log Files for Postmortem Intrusion Detection
International Conference on Advanced Information Networking and Applications	AINA	2007	research track paper	Distributed Computing	B	https://ieeexplore.ieee.org/document/4220975/	Masahiro Nagao , Gen Kitagata , Takuo Suganuma , Norio Shiratori	Stepwise Log Summarizing Method for Real-Time Network Event Handling
Journal of Software: Evolution and Process		2008	journal		B	https://www.scopus.com/inward/record.url?eid=2-s2.0-49749129669&partnerID=40&md5=5b5cf07c8f977d63df4078a006187a89	Jiang, Z.M., Hassan, A.E., Hamann, G., Flora, P.	An automated approach for abstracting execution logs to execution events
International Conference on Enterprise Information Systems	ICEIS	2008	8/2	Information Systems	C	https://www.scopus.com/inward/record.url?eid=2-s2.0-55349121225&partnerID=40&md5=6e8cc419a325b3fa61e0c53b826c16f9	Bezerra, F., Wainer, J.	Anomaly detection algorithms in business process logs
International Workshop on Visualization for Computer Security	VizSec	2008	research track paper	Computer Software	C	http://link.springer.com/chapter/10.1007/978-3-540-85933-8_15	Sergey Bratus, Axel Hansen, Fabio Pellacini, Anna Shubina	Backhoe, a Packet Trace and Log Browser
International Conference on Availability, Reliability and Security	ARES	2008	research track paper	Computer Software	B	https://ieeexplore.ieee.org/document/4529398/	Adrian Frei , Marc Rennhard	Histogram Matrix: Log File Visualization for Anomaly Detection
IEEE/IFIP International Conference on Dependable Systems	DSN	2010	research track paper	Computer Software	A	https://ieeexplore.ieee.org/document/5544279/	Marcello Cinque , Domenico Cotroneo , Roberto Natella , Antonio Pecchia	Assessing and improving the effectiveness of logs for the analysis of software faults	Event logs are the primary source of data to characterize the dependability behavior of a computing system during the operational phase. However, they are inadequate to provide evidence of software faults, which are nowadays among the main causes of system outages. This paper proposes an approach based on software fault injection to assess the effectiveness of logs to keep track of software fault…	This paper proposes an approach based on software fault injection to assess the effectiveness of logs to keep track of software faults triggered in the field.	Event logs are the primary source of data to characterize the dependability behavior of a computing system during the operational phase. However, they are inadequate to provide evidence of software faults, which are nowadays among the main causes of system outages.	Injection results are used to provide guidelines to improve the ability of logging mechanisms to report the effects of software faults. The benefits of the approach are shown by means of experimental results on three widely used software systems.		Cinque_2010		1
Annual Conference on Privacy, Security and Trust	PST	2008	research track paper	Data Format	C	https://ieeexplore.ieee.org/document/4641277/	Adetokunbo Makanju , Stephen Brooks , A. Nur Zincir-Heywood , Evangelos E. Milios	LogView: Visualizing Event Log Clusters
International Symposium on Software Reliability Engineering	ISSRE	2008	research track paper	Computer Software	A	https://ieeexplore.ieee.org/document/4700316/	Leonardo Mariani , Fabrizio Pastore	Automated Identification of Failure Causes in System Logs	Log files are commonly inspected by system administrators and developers to detect suspicious behaviors and diagnose failure causes. Since size of log files grows fast, thus making manual analysis impractical, different automatic techniques have been proposed to analyze log files. Unfortunately, accuracy and effectiveness of these techniques are often limited by the unstructured nature of logged …	This paper presents a technique to automatically analyze log files and retrieve important information to identify failure causes.	Log files are commonly inspected by system administrators and developers to detect suspicious behaviors and diagnose failure causes. Since size of log files grows fast, thus making manual analysis impractical, different automatic techniques have been proposed to analyze log files. Unfortunately, accuracy and effectiveness of these techniques are often limited by the unstructured nature of logged …			Mariani_2008											1
ACM International Conference on Knowledge Discovery and Data Mining	KDD	2009	research track paper	Data Format	A*	https://dl.acm.org/citation.cfm?id=1557154	Adetokunbo A.O. Makanju, A. Nur Zincir-Heywood, Evangelos E. Milios	Clustering event logs using iterative partitioning	The importance of event logs, as a source of information in systems and network management cannot be overemphasized. With the ever increasing size and complexity of today's event logs, the task of analyzing event logs has become cumbersome to carry out manually. For this reason recent research has focused on the automatic analysis of these log files. In this paper we present IPLoM (Iterative Part…	In this paper we present IPLoM (Iterative Partitioning Log Mining), a novel algorithm for the mining of clusters from event logs.	The importance of event logs, as a source of information in systems and network management cannot be overemphasized. With the ever increasing size and complexity of today's event logs, the task of analyzing event logs has become cumbersome to carry out manually. For this reason recent research has focused on the automatic analysis of these log files.	Through a 3-Step hierarchical partitioning process IPLoM partitions log data into its respective clusters. In its 4th and final stage IPLoM produces cluster descriptions or line formats for each of the clusters produced. Unlike other similar algorithms IPLoM is not based on the Apriori algorithm and it is able to find clusters in data whether or not its instances appear frequently.	Evaluations show that IPLoM outperforms the other algorithms statistically significantly, and it is also able to achieve an average F-Measure performance 78% when the closest other algorithm achieves an F-Measure performance of 10%.	Makanju_2009				1
ACM SIGOPS Symposium on Operating Systems Principles	SOSP	2009	research track paper	Computer Software	A*	https://www.scopus.com/inward/record.url?eid=2-s2.0-77956513188&partnerID=40&md5=f933498ff0de2c1f2a0538c2b8c77706	Xu, W., Huang, L., Fox, A., Patterson, D., Jordan, M.I.	Detecting large-scale system problems by mining console logs	Surprisingly, console logs rarely help operators detect problems in large-scale datacenter services, for they often consist of the voluminous intermixing of messages from many software components written by independent developers. We propose a general methodology to mine this rich source of information to automatically detect system runtime problems. We use a combination of program analysis and i…	We propose a general methodology to mine this rich source of information to automatically detect system runtime problems.	Surprisingly, console logs rarely help operators detect problems in large-scale datacenter services, for they often consist of the voluminous intermixing of messages from many software components written by independent developers.	We use a combination of program analysis and information retrieval techniques to transform free-text console logs into numerical features, which captures sequences of events in the system. We then analyze these features using machine learning to detect operational problems. We also show how to distill the results of our analysis to an operator-friendly one-page decision tree showing the critical …		Xu_2009						1
International Conference on Advances in ICT for Emerging Regions		2018	8/2		?	https://www.scopus.com/inward/record.url?eid=2-s2.0-85049515670&partnerID=40&md5=7b07eabe3991a6fa1950398eee0a0b30	Jayathilake P.W.D.C., Weeraddana N.R., Hettiarachchi H.K.E.P.	Automatic detection of multi-line templates in software log files
International IT Capacity and Performance Conference		2015			?	https://www.scopus.com/inward/record.url?eid=2-s2.0-84959421143&partnerID=40&md5=7bfaa59b8c083760dc478544b6bac653	Awad, M., Menascé, D.A.	Automatic workload characterization using system log analysis
Empirical Software Engineering		2009	journal	Computer Software	A	http://link.springer.com/article/10.1007/s10664-008-9084-6	Toan Huynh, James Miller	Another viewpoint on “evaluating web software reliability based on workload and failure data extracted from server logs”	An approach of determining a website’s reliability is evaluated in this paper. This technique extracts workload measures and error codes from the server’s data logs. This information is then used to calculate the reliability for a particular website. This study follows on from a previous study, and hence, can be regarded as a “partial replication” (technically, as both studies are case studies no…	An approach of determining a website’s reliability is evaluated in this paper.	Although the method proposed by the original study is feasible, the effectiveness of just using a specific error type and a specific workload to estimate the reliability of websites is questionable.	In this study, different error types and their usefulness for reliability analysis are examined and discussed.	After a thorough investigation, we believe that reliability analysis for websites must be based on more specific error definitions as they can provide a superior reliability estimate for today’s highly dynamic websites.	Huynh_2009												1
International Conference on Availability, Reliability and Security	ARES	2009	research track paper	Computer Software	B	https://ieeexplore.ieee.org/document/5066470/	Narate Taerat , Nichamon Naksinehaboon , Clayton Chandler , James Elliott , Chokchai Leangsuksun , George Ostrouchov , Stephen L. Scott , Christian Engelmann	Blue Gene/L Log Analysis and Time to Interrupt Estimation
Web Intelligence and Agent Systems: an international journal		2009	journal	Other Information and Computing Sciences Artificial Intelligence and Image Processing Cognitive Science	C	https://www.scopus.com/inward/record.url?eid=2-s2.0-62449224713&partnerID=40&md5=e396327f550ab0951d1f1a56bb8f2759	Unruh, A., Bailey, J., Ramamohanarao, K.	Building more robust multi-agent systems using a log-based approach
Conference on Communications and Network Security		2018	7/2		?	https://ieeexplore.ieee.org/document/8433138/	Tao Qin , Chao He , Hezhi Jiang , Ruoya Chen	Behavior Rhythm: An Effective Model for Massive Logs Characterizing and Security Monitoring in Cloud
International Conference on Behavioral, Economic and Socio-cultural Computing		2015	7/2		?	https://ieeexplore.ieee.org/document/7365981/	Sizhong Du , Jian Cao	Behavioral anomaly detection approach based on log monitoring
IEEE International Conference on Data Mining	ICDM	2009	research track paper	Data Format	A*	https://ieeexplore.ieee.org/document/5360240/	Qiang Fu , Jian-Guang Lou , Yi Wang , Jiang Li	Execution Anomaly Detection in Distributed Systems through Unstructured Log Analysis	Detection of execution anomalies is very important for the maintenance, development, and performance refinement of large scale distributed systems. Execution anomalies include both work flow errors and low performance problems. People often use system logs produced by distributed systems for troubleshooting and problem diagnosis. However, manually inspecting system logs to detect anomalies is unf…	In this paper, we propose an unstructured log analysis technique for anomalies detection.	Detection of execution anomalies is very important for the maintenance, development, and performance refinement of large scale distributed systems. Execution anomalies include both work flow errors and low performance problems. People often use system logs produced by distributed systems for troubleshooting and problem diagnosis. However, manually inspecting system logs to detect anomalies is unf…	In the technique, we propose a novel algorithm to convert free form text messages in log files to log keys without heavily relying on application specific knowledge. The log keys correspond to the log-print statements in the source code which can provide cues of system execution behavior. After converting log messages to log keys, we learn a Finite State Automaton (FSA) from training log sequence…	With these learned models, we can automatically detect anomalies in newly input log files. Experiments on Hadoop and SILK show that the technique can effectively detect running anomalies.	Fu_2009						1
IEEE International Conference on Data Mining	ICDM	2009	research track paper	Data Format	A*	https://ieeexplore.ieee.org/document/5360285/	Wei Xu , Ling Huang , Armando Fox , David Patterson , Michael Jordan	Online System Problem Detection by Mining Patterns of Console Logs	We describe a novel application of using data mining and statistical learning methods to automatically monitor and detect abnormal execution traces from console logs in an online setting. Different from existing solutions, we use a two stage detection system. The first stage uses frequent pattern mining and distribution estimation techniques to capture the dominant patterns (both frequent sequenc…	We describe a novel application of using data mining and statistical learning methods to automatically monitor and detect abnormal execution traces from console logs in an online setting.		Different from existing solutions, we use a two stage detection system. The first stage uses frequent pattern mining and distribution estimation techniques to capture the dominant patterns (both frequent sequences and time duration). The second stage use principal component analysis based anomaly detection technique to identify actual problems.	Using real system data from a 203-node Hadoop cluster, we show that we can not only achieve highly accurate and fast problem detection, but also help operators better understand execution patterns in their system.	Xu_2009a						1
Machine Learning and Knowledge Discovery in Databases	ECML PKDD	2009	research track paper	Data Format	A	http://link.springer.com/chapter/10.1007/978-3-642-04180-8_32	Michal Aharon, Gilad Barash, Ira Cohen, Eli Mordechai	One Graph Is Worth a Thousand Logs: Uncovering Hidden Structures in Massive System Event Logs	In this paper we describe our work on pattern discovery in system event logs. For discovering the patterns we developed two novel algorithms. The first is a sequential and efficient text clustering algorithm which automatically discovers the templates generating the messages. The second, the PARIS algorithm (Principle Atom Recognition In Sets), is a novel algorithm which discovers patterns of mes…	In this paper we describe our work on pattern discovery in system event logs		For discovering the patterns we developed two novel algorithms. The first is a sequential and efficient text clustering algorithm which automatically discovers the templates generating the messages. The second, the PARIS algorithm (Principle Atom Recognition In Sets), is a novel algorithm which discovers patterns of messages that represent processes occurring in the system. We demonstrate the use…		Aharon_2009				1
Knowledge-Based and Intelligent Information and Engineering Systems	KES	2010	research track paper	Information Systems	B	http://link.springer.com/chapter/10.1007/978-3-642-15387-7_21	Iago Porto-Díaz, Óscar Fontenla-Romero, Amparo Alonso-Betanzos	A Log Analyzer Agent for Intrusion Detection in a Multi-Agent System
IEEE Conference on Systems, Man and Cybernetics	SMC	2010		Information Systems	B	https://ieeexplore.ieee.org/document/5641988/	Yi Hu , Alina Campan , James Walden , Irina Vorobyeva , Justin Shelton	An effective log mining approach for database intrusion detection
IEEE International Conference on Data Mining	ICDM	2010	research track paper	Data Format	A*	https://ieeexplore.ieee.org/document/5694003/	Liang Tang , Tao Li	LogTree: A Framework for Generating System Events from Raw Textual Logs	Modern computing systems are instrumented to generate huge amounts of system logs and these data can be utilized for understanding and complex system behaviors. One main fundamental challenge in automated log analysis is the generation of system events from raw textual logs. Recent works apply clustering techniques to translate the raw log messages into system events using only the word/term info…	In this paper, we first illustrate the drawbacks of existing techniques for event generation from system logs. We then propose Log Tree, a novel and algorithm-independent framework for events generation from raw system log messages.	Modern computing systems are instrumented to generate huge amounts of system logs and these data can be utilized for understanding and complex system behaviors. One main fundamental challenge in automated log analysis is the generation of system events from raw textual logs. Recent works apply clustering techniques to translate the raw log messages into system events using only the word/term info…	Log Tree utilizes the format and structural information of the raw logs in the clustering process to generate system events with better accuracy. In addition, an indexing data structure, Message Segment Table, is proposed in Log Tree to significantly improve the efficiency of events creation.	Extensive experiments on real system logs demonstrate the effectiveness and efficiency of Log Tree.	Tang_2010				1
International Workshop on Big Data, Streams and Heterogeneous Source Mining: Algorithms, Systems, Programming Models and Applications		2013			?	https://dl.acm.org/citation.cfm?id=2501228	Farhana Zulkernine, Patrick Martin, Wendy Powley, Sima Soltani, Serge Mankovskii, Mark Addleman	CAPRI: a tool for mining complex line patterns in large log data
International Workshop on Large-Scale Network Security		2016	workshop		?	https://ieeexplore.ieee.org/document/7847169/	Jain-Shing Wu , Yuh-Jye Lee , Te-En Wei , Chih-Hung Hsieh , Chia-Min Lai	ChainSpot: Mining Service Logs for Cyber Security Threat Detection
IEEE/IFIP International Conference on Dependable Systems	DSN	2012	research track paper	Computer Software	A	https://ieeexplore.ieee.org/document/6263946/	Catello Di Martino , Marcello Cinque , Domenico Cotroneo	Assessing time coalescence techniques for the analysis of supercomputer logs	This paper presents a novel approach to assess time coalescence techniques. These techniques are widely used to reconstruct the failure process of a system and to estimate dependability measurements from its event logs. The approach is based on the use of automatically generated logs, accompanied by the exact knowledge of the ground truth on the failure process. The assessment is conducted by com…	This paper presents a novel approach to assess time coalescence techniques.	These techniques are widely used to reconstruct the failure process of a system and to estimate dependability measurements from its event logs.	The approach is based on the use of automatically generated logs, accompanied by the exact knowledge of the ground truth on the failure process. The assessment is conducted by comparing the presumed failure process, reconstructed via coalescence, with the ground truth. We focus on supercomputer logs, due to increasing importance of automatic event log analysis for these systems.	Experimental results show how the approach allows to compare different time coalescence techniques and to identify their weaknesses with respect to given system settings. In addition, results revealed an interesting correlation between errors caused by the coalescence and errors in the estimation of dependability measurements.	Martino_2012											1
International Conference on Distributed Computing Systems	ICDCS	2010	research track paper	Distributed Computing	A	https://ieeexplore.ieee.org/document/5541622/	Jiaqi Tan , Soila Kavulya , Rajeev Gandhi , Priya Narasimhan	Visual, Log-Based Causal Tracing for Performance Debugging of MapReduce Systems	The distributed nature and large scale of MapReduce programs and systems poses two challenges in using existing profiling and debugging tools to understand MapReduce programs. Existing tools produce too much information because of the large scale of MapReduce programs, and they do not expose program behaviors in terms of Maps and Reduces. We have developed a novel non-intrusive log-analysis techn…	We have developed a novel non-intrusive log-analysis technique which extracts state-machine views of the control- and data-flows in MapReduce behavior from the native logs of Hadoop MapReduce systems, and it synthesizes these views to create a unified, causal view of MapReduce program behavior.	The distributed nature and large scale of MapReduce programs and systems poses two challenges in using existing profiling and debugging tools to understand MapReduce programs. Existing tools produce too much information because of the large scale of MapReduce programs, and they do not expose program behaviors in terms of Maps and Reduces.	We validate our technique and visualizations using a realworld workload, showing how to understand the structure and performance behavior of MapReduce jobs, and diagnose injected performance problems reproduced from real-world problems.		Tan_2010											1
IFIP International Conference on Network and Parallel Computing	NPC	2010	research track paper	Distributed Computing	C	http://link.springer.com/chapter/10.1007/978-3-642-15672-4_23	Wei Zhou, Jianfeng Zhan, Dan Meng, Zhihong Zhang	Online Event Correlations Analysis in System Logs of Large-Scale Cluster Systems
International Conference on Intelligent Systems and Knowledge Engineering	ISKE	2010	research track paper	Artificial Intelligence and Image Processing	B	https://ieeexplore.ieee.org/document/5680850/	Jo Swinnen , Koen Vanhoof , Els Hannes	Querying event logs: Discovering non-events in event logs
Large Installation System Administration Conference	LISA	2010			?	http://static.usenix.org/events/lisa10/tech/full_papers/lisa10_proceedings.pdf#page=171	Ariel Rabkin, Randy Katz	Chukwa: A system for reliable large-scale log collection
International Conference on Ubiquitous Information Management and Communication		2017			?	https://dl.acm.org/citation.cfm?id=3022288	BKSP Kumar Raju, Nikhil Bharadwaj Gosala, G Geethakumari	CLOSER: applying aggregation for effective event reconstruction of cloud service logs
International Symposium on Reliable Distributed Systems	SRDS	2010	research track paper	Distributed Computing	A	https://ieeexplore.ieee.org/document/5623389/	Pin Zhou , Binny Gill , Wendy Belluomini , Avani Wildani	GAUL: Gestalt Analysis of Unstructured Logs for Diagnosing Recurring Problems in Large Enterprise Storage Systems	We present GAUL, a system to automate the whole log comparison between a new problem and the ones diagnosed in the past to identify recurring problems. GAUL uses a fuzzy match algorithm based on the contextual overlap between log lines and efficiently implements this using scalable index/search. The accuracy and efficiency of the comparison is further improved by leveraging problem set informatio…	We present GAUL, a system to automate the whole log comparison between a new problem and the ones diagnosed in the past to identify recurring problems.		GAUL uses a fuzzy match algorithm based on the contextual overlap between log lines and efficiently implements this using scalable index/search. The accuracy and efficiency of the comparison is further improved by leveraging problem set information and noise tolerance techniques. We evaluate GAUL using 4339 customer problems that occurred in all field deployments of an enterprise storage system o…	Our results show that with human-filtered logs, GAUL can identify the correct problem set 66% of the time among the top10 matches, which is 15% more accurate than the VSM system that uses cosine similarity and 19% more accurate than the ERRCMP system that uses error codes for log comparison. With unfiltered logs, the top10 match accuracy of GAUL is 40%, which is 22% more accurate than VSM and 26%…	Zhou_2010				1
International Symposium on Software Reliability Engineering	ISSRE	2010	research track paper	Computer Software	A	https://ieeexplore.ieee.org/document/5635046/	Sean Banerjee , Hema Srikanth , Bojan Cukic	Log-Based Reliability Analysis of Software as a Service (SaaS)	Software as a Service (SaaS) has gained momentum in the past few years and businesses have been increasingly moving to SaaS model for their IT solutions. SaaS is a newer and transformed model where software is delivered to customers as a service over the web. With the SaaS model, there is a need for service providers to ensure that the services are available and reliable for end users at all time…	In this paper, we expand traditional approaches to reliability analysis of traditional web servers and propose methods tailored towards assessing the workload and reliability of SaaS applications.	Software as a Service (SaaS) has gained momentum in the past few years and businesses have been increasingly moving to SaaS model for their IT solutions. SaaS is a newer and transformed model where software is delivered to customers as a service over the web. With the SaaS model, there is a need for service providers to ensure that the services are available and reliable for end users at all time…	In addition we show the importance of data filtration when assessing SaaS reliability from log files. Finally, we discuss the suitability of reliability measures with respect to their relevance in the context of SLAs.		Banerjee_2010												1
Rough Sets and Knowledge Technology		2014			?	http://link.springer.com/chapter/10.1007/978-3-319-11740-9_23	Xin Cheng, Ruizhi Wang	Communication Network Anomaly Detection Based on Log File Analysis
European Conference on Information Warfare and Security		2013	10/1		?	https://www.scopus.com/inward/record.url?eid=2-s2.0-84893487079&partnerID=40&md5=8c1f175084b8c0066a866e780fb98872	Vaarandi, R., Niziński, P.	Comparative analysis of open-source log management solutions for security monitoring and network forensics
USENIX Annual Technical Conference	USENIX	2010	research track paper	Information and Computing Sciences	A	https://www.usenix.org/event/atc10/tech/full_papers/Lou.pdf	Jian-Guang LOU, Qiang FU, Shengqi YANG, Ye XU, Jiang LI	Mining Invariants from Console Logs for System Problem Detection.	Detecting execution anomalies is very important to the maintenance and monitoring of large-scale distributed systems. People often use console logs that are produced by distributed systems for troubleshooting and problem diagnosis. However, manually inspecting console logs for the detection of anomalies is unfeasible due to the increasing scale and complexity of distributed systems. Therefore, th…	In this paper, we propose an unstructured log analysis technique for anomaly detection, with a novel algorithm to automatically discover program invariants in logs.	Detecting execution anomalies is very important to the maintenance and monitoring of large-scale distributed systems. People often use console logs that are produced by distributed systems for troubleshooting and problem diagnosis. However, manually inspecting console logs for the detection of anomalies is unfeasible due to the increasing scale and complexity of distributed systems. Therefore, th…	At first, a log parser is used to convert the unstructured logs to structured logs. Then, the structured log messages are further grouped to log message groups according to the relationship among log parameters. After that, the program invariants are automatically mined from the log message groups. The mined invariants can reveal the inherent linear characteristics of program work flows. With the…	Experiments on Hadoop show that the technique can effectively detect execution anomalies. Compared with the state of art, our approach can not only detect numerous real problems with high accuracy but also provide intuitive insight into the problems.	Lou_2010											1
International Conference on Ubiquitous Robots and Ambient Intelligence		2014			?	https://ieeexplore.ieee.org/document/7057539/	Stephan Puls , Daniel Lemcke , Heinz Worn	Context-sensitive natural language generation for human readable event logs based on situation awareness in human-robot cooperation
NSDI'10: Proceedings of the USENIX conference on Networked systems design and implementation		2010			B	https://dl.acm.org/citation.cfm?id=1855735	Vinh The Lam, Michael Mitzenmacher, George Varghese	Carousel: scalable logging for intrusion prevention systems
International Conference on Engineering Applications of Neural Networks	EANN	2011	research track paper	Artificial Intelligence and Image Processing	C	http://link.springer.com/chapter/10.1007/978-3-642-23957-1_20	Tuomo Sipola, Antti Juvonen, Joel Lehtonen	Anomaly Detection from Network Logs Using Diffusion Maps
IBM Journal of Research and Development		2011	journal	Computer Software Information Systems	A	https://www.scopus.com/inward/record.url?eid=2-s2.0-81555212616&partnerID=40&md5=cbfb6657bc8f4db915b3d2da41a76af2	Aharoni, E., Fine, S., Goldschmidt, Y., Lavi, O., Margalit, O., Rosen-Zvi, M., Shpigelman, L.	Smarter log analysis	Modern computer systems generate an enormous number of logs. IBM Mining Effectively Large Output Data Yield (MELODY) is a unique and innovative solution for handling these logs and filtering out the anomalies and failures. MELODY can detect system errors early on and avoid subsequent crashes by identifying the root causes of such errors. By analyzing the logs leading up to a problem, MELODY can p…	IBM Mining Effectively Large Output Data Yield (MELODY) is a unique and innovative solution for handling these logs and filtering out the anomalies and failures. MELODY can detect system errors early on and avoid subsequent crashes by identifying the root causes of such errors.	Modern computer systems generate an enormous number of logs.	By analyzing the logs leading up to a problem, MELODY can pinpoint when and where things went wrong and visually present them to the user, ensuring that corrections are accurately and effectively done. We present the MELODY solution and describe its architecture, algorithmic components, functions, and benefits. After being trained on a large portion of relevant data, MELODY provides alerts of abn…	They found that the solution's ability to reduce extensively large log data to manageable sets of highlighted messages saved them time and helped them make better use of the data.	Aharoni_2011													1
International Conference on Extending Database Technology		2002	18/1		?	https://link.springer.com/10.1007/3-540-45876-X_8	Wenwu Lou, Guimei Liu, Hongjun Lu, Qiang Yang	Cut-and-pick transactions for proxy log mining
World Academy of Science, Engineering and Technology		2008			?	https://www.researchgate.net/profile/Mohd_Helmy_Abd_Wahab/publication/303065182_Data_Pre-processing_on_Web_Server_Logs_for_Generalized_Association_Rules_Mining/links/5736956b08ae298602e0a958/Data-Pre-processing-on-Web-Server-Logs-for-Generalized-Association-Rules-Mining.pdf	Mohd Helmy Abd Wahab, Mohd Norzali Haji Mohd, Hafizul Fahri Hanafi, Mohamad Farhan Mohamad Mohsin	Data pre-processing on web server logs for generalized association rules mining algorithm
International Conference on Dependable, Autonomic and Secure Computin	DASC	2011	research track paper	Computer Software	C	https://ieeexplore.ieee.org/document/6118346/	Edward Chuah , Gary Lee , William-Chandra Tjhi , Shyh-Hao Kuo , Terence Hung , John Hammond , Tommy Minyard , James C. Browne	Establishing Hypothesis for Recurrent System Failures from Cluster Log Files
IEEE International Parallel and Distributed Processing Symposium	IPDPS	2011	research track paper	Distributed Computing	A	https://ieeexplore.ieee.org/document/6012893/	Ziming Zheng , Li Yu , Wei Tang , Zhiling Lan , Rinku Gupta , Narayan Desai , Susan Coghlan , Daniel Buettner	Co-analysis of RAS Log and Job Log on Blue Gene/P	With the growth of system size and complexity, reliability has become of paramount importance for petascale systems. Reliability, Availability, and Serviceability (RAS) logs have been commonly used for failure analysis. However, analysis based on just the RAS logs has proved to be insufficient in understanding failures and system behaviors. To overcome the limitation of this existing methodologie…	To overcome the limitation of this existing methodologies, we analyze the Blue Gene/P RAS logs and the Blue Gene/P job logs in a cooperative manner.	With the growth of system size and complexity, reliability has become of paramount importance for petascale systems. Reliability, Availability, and Serviceability (RAS) logs have been commonly used for failure analysis. However, analysis based on just the RAS logs has proved to be insufficient in understanding failures and system behaviors.	From our co-analysis effort, we have identified a dozen important observations about failure characteristics and job interruption characteristics on the Blue Gene/P systems.	These observations can significantly facilitate the research in fault resilience of large-scale systems.	Zheng_2011								1
Expert Systems with Applications		2011	journal	Artificial Intelligence and Image Processing Information Systems Applied Mathematics	B	https://www.scopus.com/inward/record.url?eid=2-s2.0-79953720253&partnerID=40&md5=8324a58a50914499f24b3fe322299b04	Kim, S., Cho, N.W., Kang, B., Kang, S.-H.	Fast outlier detection for very large log data
International Conference on Parallel Processing	Euro-Par	2011	research track paper	Distributed Computing	A	https://link.springer.com/chapter/10.1007/978-3-642-23400-2_6	Ana Gainaru, Franck Cappello, Stefan Trausan-Matu, Bill Kramer	Event log mining tool for large scale HPC systems	Event log files are the most common source of information for the characterization of events in large scale systems. However the large size of these files makes the task of manual analysing log messages to be difficult and error prone. This is the reason why recent research has been focusing on creating algorithms for automatically analysing these log files. In this paper we present a novel metho…	In this paper we present a novel methodology for extracting templates that describe event formats from large datasets presenting an intuitive and user-friendly output to system administrators.	Event log files are the most common source of information for the characterization of events in large scale systems. However the large size of these files makes the task of manual analysing log messages to be difficult and error prone. This is the reason why recent research has been focusing on creating algorithms for automatically analysing these log files.	Our algorithm is able to keep up with the rapidly changing environments by adapting the clusters to the incoming stream of events. For testing our tool, we have chosen 5 log files that have different formats and that challenge different aspects in the clustering task.	The experiments show that our tool outperforms all other algorithms in all tested scenarios achieving an average precision and recall of 0.9, increasing the correct number of groups by a factor of 1.5 and decreasing the number of false positives and negatives by an average factor of 4.	Gainaru_2011				1
Advances in Information and Computer Security		2018	journal		?	http://link.springer.com/chapter/10.1007/978-3-319-97916-8_10	Katsutaka Ito, Hirokazu Hasegawa, Yukiko Yamaguchi, Hajime Shimada	Detecting Privacy Information Abuse by Android Apps from API Call Logs
International Symposium on Reliable Distributed Systems	SRDS	2011	research track paper	Distributed Computing	A	https://ieeexplore.ieee.org/document/6076757/	Kamal Kc , Xiaohui Gu	ELT: Efficient Log-based Troubleshooting System for Cloud Computing Infrastructures	We present an Efficient Log-based Troubleshooting(ELT) system for cloud computing infrastructures. ELT adopts a novel hybrid log mining approach that combines coarse-grained and fine-grained log features to achieve both high accuracy and low overhead. Moreover, ELT can automatically extract key log messages and perform invariant checking to greatly simplify the troubleshooting task for the system…	We present an Efficient Log-based Troubleshooting(ELT) system for cloud computing infrastructures.		ELT adopts a novel hybrid log mining approach that combines coarse-grained and fine-grained log features to achieve both high accuracy and low overhead. Moreover, ELT can automatically extract key log messages and perform invariant checking to greatly simplify the troubleshooting task for the system administrator. We have implemented a prototype of the ELT system and conducted an extensive experi…	Our experimental results show that ELT can achieve more efficient and powerful troubleshooting support than existing schemes. More importantly, ELT can find software bugs that cannot be detected by current cloud system management practice.	Kc_2011											1
Australasian Information Security Conference		2011	10/1		Unranked	https://dl.acm.org/citation.cfm?id=2460421	Malcolm Corney, George Mohay, Andrew Clark	Detection of anomalies from user profiles generated from system logs
Conference on Data and application security and privacy		2011	12/2		?	https://dl.acm.org/citation.cfm?id=1943524	You Chen, Bradley Malin	Detection of anomalous insiders in collaborative environments via relational analysis of access logs
ACM Symposium on Applied Computing	SAC	2011	research track paper	Data Format	B	https://dl.acm.org/citation.cfm?id=1982298	Adetokunbo Makanju, A. Nur Zincir-Heywood, Evangelos E. Milios	Storage and retrieval of system log events using a structured schema based on message type transformation
International Journal of Internet Technology and Secured Transactions		2011			C	https://www.scopus.com/inward/record.url?eid=2-s2.0-84878807413&partnerID=40&md5=79b55c1dd1c9b6449016d5f38f291162	Nehinbe, J.O.	Understanding the decision rules for partitioning logs of intrusion detection systems (IDS)
World Congress on Computing and Communication Technologies		2014			?	https://ieeexplore.ieee.org/document/6755103/	M. Gomathy , V. Karthika Devi , D. Meenakshi	Developing an Error Logging Framework for Ruby on Rails Application Using AOP
International Systems and Storage Conference		2017			?	https://dl.acm.org/citation.cfm?id=3078484	Rukma Talwadker	Dexter: faster troubleshooting of misconfiguration cases using system logs
International Journal of Information Security		2012	journal		C	https://link.springer.com/article/10.1007/s10207-012-0163-8	Dina Hadžiosmanović, Damiano Bolzoni, Pieter H. Hartel	A log mining approach for process monitoring in SCADA
ACM Transactions on Computer Systems	TOCS	2012	journal	Computer Software Information Systems	A*	https://dl.acm.org/citation.cfm?id=2110360	Ding Yuan, Jing Zheng, Soyeon Park, Yuanyuan Zhou, Stefan Savage	Improving software diagnosability via log enhancement	Diagnosing software failures in the field is notoriously difficult, in part due to the fundamental complexity of troubleshooting any complex software system, but further exacerbated by the paucity of information that is typically available in the production setting. Indeed, for reasons of both overhead and privacy, it is common that only the run-time log generated by a system (e.g., syslog) can b…	We describe a tool, LogEnhancer that automatically “enhances” existing logging code to aid in future post-failure debugging.	Diagnosing software failures in the field is notoriously difficult, in part due to the fundamental complexity of troubleshooting any complex software system, but further exacerbated by the paucity of information that is typically available in the production setting. Indeed, for reasons of both overhead and privacy, it is common that only the run-time log generated by a system (e.g., syslog) can b…	We evaluate LogEnhancer on eight large, real-world applications	[we] demonstrate that it can dramatically reduce the set of potential root failure causes that must be considered while imposing negligible overheads.	Yuan_2012a		1
Annual Computer Software and Applications Conference		2012	research track paper		?	https://ieeexplore.ieee.org/document/6340147/	Theodoros Kalamatianos , Kostas Kontogiannis , Peter Matthews	Domain Independent Event Analysis for Log Data Reduction
IEEE Transactions on Knowledge and Data Engineering		2012	journal	Data Format	A	https://ieeexplore.ieee.org/document/5936060/	Adetokunbo Makanju , A. Nur Zincir-Heywood , Evangelos E. Milios	A Lightweight Algorithm for Message Type Extraction in System Application Logs	Message type or message cluster extraction is an important task in the analysis of system logs in computer networks. Defining these message types automatically facilitates the automatic analysis of system logs. When the message types that exist in a log file are represented explicitly, they can form the basis for carrying out other automatic application log analysis tasks. In this paper, we intro…	In this paper, we introduce a novel algorithm for carrying out message type extraction from event log files.	Message type or message cluster extraction is an important task in the analysis of system logs in computer networks. Defining these message types automatically facilitates the automatic analysis of system logs. When the message types that exist in a log file are represented explicitly, they can form the basis for carrying out other automatic application log analysis tasks.	IPLoM, which stands for Iterative Partitioning Log Mining, works through a 4-step process. The first three steps hierarchically partition the event log into groups of event log messages or event clusters. In its fourth and final stage, IPLoM produces a message type description or line format for each of the message clusters. IPLoM is able to find clusters in data irrespective of the frequency of …	Evaluations show that IPLoM outperforms similar algorithms statistically significantly.	Makanju_2012				1
International Conference on Sensing, Communication, and Networking		2014	9/2		?	https://ieeexplore.ieee.org/document/6990375/	Wei Dong , Chao Huang , Jiliang Wang , Chun Chen , Jiajun Bu	Dynamic logging with Dylog for networked embedded systems
Science and Information Conference		2015			?	https://ieeexplore.ieee.org/document/7237305/	Aadil Al-Mahrouqi , Sameh Abdalla , Tahar Kechadi	Efficiency of network event logs as admissible digital evidence
International Journal of Computer Science and Information Security		2009	journal		?	https://arxiv.org/abs/0907.5433	Ratnesh Kumar Jain, Dr. R. S. Kasana, Dr. Suresh Jain	Efficient web log mining using doubly linked tree
IEEE Network Operations and Management Symposium	NOMS	2012	research track paper	Computer Hardware	B	https://ieeexplore.ieee.org/document/6211882/	Adetokunbo Makanju , A. Nur Zincir-Heywood , Evangelos E. Milios	Interactive learning of alert signatures in High Performance Cluster system logs
Symposium and Bootcamp on the Science of Security		2015			?	https://dl.acm.org/citation.cfm?id=2746200	Jason King, Rahul Pandita, Laurie Williams	Enabling forensics by proposing heuristics to identify mandatory log events
International Conference on Computing, Networking and Communications		2017	7/2		?	https://ieeexplore.ieee.org/document/7876181/	Umair Sajid Hashmi , Arsalan Darbandi , Ali Imran	Enabling proactive self-healing by data mining network failure logs
IEEE/IFIP International Conference on Dependable Systems	DSN	2013	research track paper	Computer Software	A	https://www.scopus.com/inward/record.url?eid=2-s2.0-84883367588&partnerID=40&md5=b0a28ae69f598f6e0d3661d192d1d878	El-Sayed, N., Schroeder, B.	Reading between the lines of failure logs: Understanding how HPC systems fail	As the component count in supercomputing installations continues to increase, system reliability is becoming one of the major issues in designing HPC systems. These issues will become more challenging in future Exascale systems, which are predicted to include millions of CPU cores. Even with relatively reliable individual components, the sheer number of components will increase failure rates to u…	In this paper we use a decade worth of field data made available by Los Alamos National Lab to study the impact of a diverse set of factors on the reliability of HPC systems.	As the component count in supercomputing installations continues to increase, system reliability is becoming one of the major issues in designing HPC systems. These issues will become more challenging in future Exascale systems, which are predicted to include millions of CPU cores. Even with relatively reliable individual components, the sheer number of components will increase failure rates to u…	We provide insights into the nature of correlations between failures, and investigate the impact of factors, such as the power quality, temperature, fan and chiller reliability, system usage and utilization, and external factors, such as cosmic radiation, on system reliability		Sayed_2013												1
IEEE/IFIP International Conference on Dependable Systems	DSN	2015	research track paper	Computer Software	A	https://ieeexplore.ieee.org/document/7266837/	Alina Oprea , Zhou Li , Ting-Fang Yen , Sang H. Chin , Sumayah Alrwais	Detection of Early-Stage Enterprise Infection by Mining Large-Scale Log Data	Recent years have seen the rise of sophisticated attacks including advanced persistent threats (APT) which pose severe risks to organizations and governments. Additionally, new malware strains appear at a higher rate than ever before. Since many of these malware evade existing security products, traditional defenses deployed by enterprises today often fail at detecting infections at an early stag…	We address the problem of detecting early-stage APT infection by proposing a new framework based on belief propagation inspired from graph theory.	Recent years have seen the rise of sophisticated attacks including advanced persistent threats (APT) which pose severe risks to organizations and governments. Additionally, new malware strains appear at a higher rate than ever before. Since many of these malware evade existing security products, traditional defenses deployed by enterprises today often fail at detecting infections at an early stag…	We achieve high accuracy on two months of DNS logs released by Los Alamos National Lab (LANL), which include APT infection attacks simulated by LANL domain experts. We also apply our algorithms to 38TB of web proxy logs collected at the border of a large enterprise and identify hundreds of malicious domains overlooked by state-of-the-art security products.	We demonstrate that our techniques perform well on two large datasets.	Oprea_2015							1
IEEE Network Operations and Management Symposium	NOMS	2012	research track paper	Computer Hardware	B	https://ieeexplore.ieee.org/document/6212005/	Haibo Mi , Huaimin Wang , Gang Yin , Hua Cai , Qi Zhou , Tingtao Sun	Performance problems diagnosis in cloud computing systems by mining request trace logs
New Generation Computing: computing paradigms and computational intelligence		2012	journal		B	https://link.springer.com/article/10.1007/s00354-012-0105-z	Hamid Saadatfar, Hamid Fadishei, Hossein Deldari	Predicting job failures in AuverGrid based on workload log analysis
CEUR Workshop Proceedings		2015	15/1		?	https://www.scopus.com/inward/record.url?eid=2-s2.0-84937703874&partnerID=40&md5=1d859c7b5b9c243f880241090a3355ea	Mokhov, A., Carmona, J.	Event log visualisation with conditional partial order graphs: From control flow to data
International Symposium on Reliable Distributed Systems	SRDS	2012	research track paper	Distributed Computing	A	https://ieeexplore.ieee.org/document/6424841/	Xiaoyu Fu , Rui Ren , Jianfeng Zhan , Wei Zhou , Zhen Jia , Gang Lu	LogMaster: Mining Event Correlations in Logs of Large-Scale Cluster Systems	This paper presents a set of innovative algorithms and a system, named Log Master, for mining correlations of events that have multiple attributions, i.e., node ID, application ID, event type, and event severity, in logs of large-scale cloud and HPC systems. Different from traditional transactional data, e.g., supermarket purchases, system logs have their unique characteristics, and hence we prop…	This paper presents a set of innovative algorithms and a system, named Log Master, for mining correlations of events that have multiple attributions, i.e., node ID, application ID, event type, and event severity, in logs of large-scale cloud and HPC systems.	Different from traditional transactional data, e.g., supermarket purchases, system logs have their unique characteristics, and hence we propose several innovative approaches to mining their correlations.	We parse logs into an n-ary sequence where each event is identified by an informative nine-tuple. We propose a set of enhanced apriori-like algorithms for improving sequence mining efficiency, we propose an innovative abstraction-event correlation graphs (ECGs) to represent event correlations, and present an ECGs-based algorithm for fast predicting events.	The experimental results on three logs of production cloud and HPC systems, varying from 433490 entries to 4747963 entries, show that our method can predict failures with a high precision and an acceptable recall rates.	Fu_2012									1
ACM Symposium on Applied Computing	SAC	2012	research track paper	Data Format	B	https://dl.acm.org/citation.cfm?id=2245395	A. Makanju, A. Nur Zincir-Heywood, Evangelos E. Milios, Markus Latzel	Spatio-temporal decomposition, clustering and identification for alert detection in system logs
Symposium on Networked Systems, Design and Implementation	NSDI	2012	research track paper	Distributed Computing	B	https://dl.acm.org/citation.cfm?id=2228334	Karthik Nagara, Charles Killian, Jennifer Neville	Structured comparative analysis of systems logs to diagnose performance problems
International Symposium on Software Reliability Engineering	ISSRE	2012	research track paper	Computer Software	A	https://ieeexplore.ieee.org/document/6405402/	Antonio Pecchia , Stefano Russo	Detection of Software Failures through Event Logs: An Experimental Study	Software faults are recognized to be among the main responsible for system failures in many application domains. Event logs play a key role to support the analysis of failures occurring under real workload conditions. Nevertheless, field experience suggests that event logs may be inaccurate at reporting software failures or they fail to provide accurate support for understanding their causes. Thi…	This paper analyzes the factors that determine accurate detection of software failures through event logs.	Software faults are recognized to be among the main responsible for system failures in many application domains. Event logs play a key role to support the analysis of failures occurring under real workload conditions. Nevertheless, field experience suggests that event logs may be inaccurate at reporting software failures or they fail to provide accurate support for understanding their causes.	The study is based on a data set of 17,387 experiments where failures have been induced by means of software fault injection into three systems.	Analysis reveals that the reporting ability of logs collected during the experiments, is not influenced by the type of fault that is activated at runtime. More importantly, analysis demonstrates that, despite the considered systems adopt very similar detection mechanisms, the ability of logs at reporting a given type of failure changes significantly across the systems. A closer inspection of coll…	Pecchia_2012		1
Research in Attacks, Intrusions, and Defenses	RAID	2012	research track paper	Data Format	A	http://link.springer.com/chapter/10.1007/978-3-642-33338-5_15	Jie Chu, Zihui Ge, Richard Huber, Ping Ji, Jennifer Yates, Yung-Chao Yu	ALERT-ID: Analyze Logs of the Network Element in Real Time for Intrusion Detection	The security of the networking infrastructure (e.g., routers and switches) in large scale enterprise or Internet service provider (ISP) networks is mainly achieved through mechanisms such as access control lists (ACLs) at the edge of the network and deployment of centralized AAA (authentication, authorization and accounting) systems governing all access to network devices. However, a misconfigure…	We analyze device access logs collected via the AAA system, particularly TACACS+, in a global tier-1 ISP network and extract features that can be used to distinguish normal operational activities from rogue/anomalous ones.	The security of the networking infrastructure (e.g., routers and switches) in large scale enterprise or Internet service provider (ISP) networks is mainly achieved through mechanisms such as access control lists (ACLs) at the edge of the network and deployment of centralized AAA (authentication, authorization and accounting) systems governing all access to network devices. However, a misconfigure…	Based on our analyses, we develop a real-time intrusion detection system that constructs normal behavior models with respect to device access patterns and the configuration and control activities of individual accounts from their long-term historical logs and alerts in real-time when usage deviates from the models.	Our evaluation shows that this system effectively identifies potential intrusions and misuses with an acceptable level of overall alarm rate.	Chu_2012							1
Annual Computer Security Applications Conference	ACSAC	2013	research track paper	Computer Software	A	https://dl.acm.org/citation.cfm?id=2523670	Ting-Fang Yen, Alina Oprea, Kaan Onarlioglu, Todd Leetham, William Robertson, Ari Juels, Engin Kirda	Beehive: large-scale log analysis for detecting suspicious activity in enterprise networks	As more and more Internet-based attacks arise, organizations are responding by deploying an assortment of security products that generate situational intelligence in the form of logs. These logs often contain high volumes of interesting and useful information about activities in the network, and are among the first data sources that information security specialists consult when they suspect that …	We present a novel system, Beehive, that attacks the problem of automatically mining and extracting knowledge from the dirty log data produced by a wide variety of security products in a large enterprise.	As more and more Internet-based attacks arise, organizations are responding by deploying an assortment of security products that generate situational intelligence in the form of logs. These logs often contain high volumes of interesting and useful information about activities in the network, and are among the first data sources that information security specialists consult when they suspect that …	We improve on signature-based approaches to detecting security incidents and instead identify suspicious host behaviors that Beehive reports as potential security incidents. These incidents can then be further analyzed by incident response teams to determine whether a policy violation or attack has occurred. We have evaluated Beehive on the log data collected in a large enterprise, EMC, over a pe…		Yen_2013							1
International Conference on Software Engineering	ICSE	2012	research track paper	Computer Software	A*	https://dl.acm.org/citation.cfm?id=2337236	Ding Yuan, Soyeon Park, Yuanyuan Zhou	Characterizing logging practices in open-source software	Software logging is a conventional programming practice. As its efficacy is often important for users and developers to understand what have happened in production run, yet software logging is often done in an arbitrarily manner. So far, there have been little study for understanding logging practices in real world software. This paper makes the first attempt (to the best of our knowledge) to pro…	This paper makes the first attempt (to the best of our knowledge) to provide quantitative characteristic study of the current log messages within four pieces of large open-source software.	Software logging is a conventional programming practice. As its efficacy is often important for users and developers to understand what have happened in production run, yet software logging is often done in an arbitrarily manner. So far, there have been little study for understanding logging practices in real world software.	First, we quantitatively show that software logging is pervasive. By examining developers’ own modifications to logging code in revision history, we find that they often do not make the log messages right in their first attempts, and thus need to spend significant amount of efforts to modify the log messages as after-thoughts. Our study further provides several interesting findings on where devel…	To demonstrate the benefit of our study, we built a simple checker based on one of our findings and effectively detected 138 new problematic logging code from studied software (24 of them are already confirmed and fixed by developers).	Yuan_2012	1
IEEE International Conference on Engineering of Complex Computer Systems	ICECCS	2013	research track paper	Communications Technologies	A	https://ieeexplore.ieee.org/document/6601828/	Atef Shalan , Mohammad Zulkernine	Runtime Prediction of Failure Modes from System Error Logs	Predicting potential failure occurrences during runtime is important to achieve system resilience and avoid hazardous consequences of failures. Existing failure prediction techniques in software systems involve forecasting failure counts, effects, and occurrences. Most of these techniques predict failures that may occur in future runtime intervals and only few techniques predict them at runtime. …	In this paper, we provide an approach for predicting failure occurrences and modes during system runtime.	Predicting potential failure occurrences during runtime is important to achieve system resilience and avoid hazardous consequences of failures. Existing failure prediction techniques in software systems involve forecasting failure counts, effects, and occurrences. Most of these techniques predict failures that may occur in future runtime intervals and only few techniques predict them at runtime. …	Our methodology utilizes system error log records to craft runtime error-spread signature. Using system error log history, we determine a predictive function (estimator) for each failure mode based on these signatures. This estimator can be used to predict a failure mode eventuality measure (a probability of failure mode occurrence) from system error log during system runtime. An experimental eva…	Our results show high accuracy of failure occurrence and mode predictions.	Shalan_2013									1
Formal Techniques for Safety-Critical Systems		2015	workshop		?	http://link.springer.com/chapter/10.1007/978-3-319-17581-2_1	Klaus Havelund, Rajeev Joshi	Experience with Rule-Based Analysis of Spacecraft Logs
International Workshop on Systematic Approaches to Digital Forensic Engineering		2010			?	https://ieeexplore.ieee.org/document/5491960/	Sebastian Schmerl , Michael Vogel , René Rietz , Hartmut König	Explorative Visualization of Log Data to Support Forensic Analysis and Signature Development
IEEE Transactions on Software Engineering	TSE	2013	journal	Computer Software Information Systems	A*	https://ieeexplore.ieee.org/document/6320555/	Marcello Cinque , Domenico Cotroneo , Antonio Pecchia	Event Logs for the Analysis of Software Failures: A Rule-Based Approach	Event logs have been widely used over the last three decades to analyze the failure behavior of a variety of systems. Nevertheless, the implementation of the logging mechanism lacks a systematic approach and collected logs are often inaccurate at reporting software failures: This is a threat to the validity of log-based failure analysis. This paper analyzes the limitations of current logging mech…	This paper analyzes the limitations of current logging mechanisms and proposes a rule-based approach to make logs effective to analyze software failures.	Event logs have been widely used over the last three decades to analyze the failure behavior of a variety of systems. Nevertheless, the implementation of the logging mechanism lacks a systematic approach and collected logs are often inaccurate at reporting software failures: This is a threat to the validity of log-based failure analysis.	The approach leverages artifacts produced at system design time and puts forth a set of rules to formalize the placement of the logging instructions within the source code. The validity of the approach, with respect to traditional logging mechanisms, is shown by means of around 12,500 software fault injection experiments into real-world systems.		Cinque_2013		1
European Workshop on Dependable Computing		2011	6/2		?	https://dl.acm.org/citation.cfm?id=1978599	Midori Sugaya, Ken Igarashi, Masaaki Goshima, Shinpei Nakata, Kimio Kuramitsu	Extensible online log analysis system
IEEE/IFIP International Conference on Dependable Systems	DSN	2016	industry track paper	Computer Software	A	https://ieeexplore.ieee.org/document/7579781/	Pinjia He , Jieming Zhu , Shilin He , Jian Li , Michael R. Lyu	An Evaluation Study on Log Parsing and Its Use in Log Mining	Logs, which record runtime information of modern systems, are widely utilized by developers (and operators) in system development and maintenance. Due to the ever-increasing size of logs, data mining models are often adopted to help developers extract system behavior information. However, before feeding logs into data mining models, logs need to be parsed by a log parser because of their unstruct…	To address this issue, in this paper, we study four log parsers and package them into a toolkit to allow their reuse.	Although log parsing has been widely studied in recent years, users are still unaware of the advantages of different log parsers nor the impact of them on subsequent log mining tasks. Thus they often re-implement or even re-design a new log parser, which would be time-consuming yet redundant.		In addition, we obtain six insightful findings by evaluating the performance of the log parsers on five datasets with over ten million raw log messages, while their effectiveness on a real-world log mining task has been thoroughly examined.	He_2016				1
International Parallel and Distributed Processing Symposium Workshop		2016	WORKSHOP		?	https://ieeexplore.ieee.org/document/7530062/	Yining Zhao , Haili Xiao	Extracting Log Patterns from System Logs in LARGE
International Conference on Runtime Verification	RV	2013	research track paper	Computer Software	C	http://link.springer.com/chapter/10.1007/978-3-642-35632-2_17	David Basin, Felix Klaedtke, Srdjan Marinovic, Eugen Zălinescu	Monitoring Compliance Policies over Incomplete and Disagreeing Logs
International Symposium on Reliable Distributed Systems	SRDS	2013	research track paper	Distributed Computing	A	https://ieeexplore.ieee.org/document/6656267/	Edward Chuah , Arshad Jhumka , Sai Narasimhamurthy , John Hammond , James C. Browne , Bill Barth	Linking Resource Usage Anomalies with System Failures from Cluster Log Data	Bursts of abnormally high use of resources are thought to be an indirect cause of failures in large cluster systems, but little work has systematically investigated the role of high resource usage on system failures, largely due to the lack of a comprehensive resource monitoring tool which resolves resource use by job and node. The recently developed TACC_Stats resource use monitor provides the r…	This paper presents the ANCOR diagnostics system that applies TACC_Stats data to identify resource use anomalies and applies log analysis to link resource use anomalies with system failures.	Bursts of abnormally high use of resources are thought to be an indirect cause of failures in large cluster systems, but little work has systematically investigated the role of high resource usage on system failures, largely due to the lack of a comprehensive resource monitoring tool which resolves resource use by job and node. The recently developed TACC_Stats resource use monitor provides the r…	Application of ANCOR to first identify multiple sources of resource anomalies on the Ranger supercomputer, then correlate them with failures recorded in the message logs and diagnosing the cause of the failures, has identified four new causes of compute node soft lockups. ANCOR can be adapted to any system that uses a resource use monitor which resolves resource use by job.		Chuah_2013								1
International Conference on Collaborative Computing: Networking, Applications and Worksharing		2013	8/2		?	https://ieeexplore.ieee.org/document/6680025/	John Dwyer , Traian Marius Truta	Finding anomalies in windows event logs using standard deviation
International Conference on Knowledge Science, Engineering and Management	KSEM	2013			B	http://link.springer.com/chapter/10.1007/978-3-642-39787-5_44	Jungang Xu, Hui Li	The Failure Prediction of Cluster Systems Based on System Logs
Journal of Aerospace Computing, Information, and Communication		2010	journal		?	https://arc.aiaa.org/doi/abs/10.2514/1.49356	Howard Barringer , Alex Groce , Klaus Havelund , Margaret Smith	Formal analysis of log files
Digital Forensics and Cyber Crime		2012	16/1		?	http://link.springer.com/chapter/10.1007/978-3-642-35515-8_13	Sean Thorpe, Indrakshi Ray, Indrajit Ray, Tyrone Grandison, Abbie Barbir, Robert France	Formal Parameterization of Log Synchronization Events within a Distributed Forensic Compute Cloud Database Environment
International Workshop on Visualization for Cyber Security	VizSec	2013	research track paper	Computer Software	C	https://dl.acm.org/citation.cfm?id=2517958	Mansour Alsaleh, Abdullah Alqahtani, Abdulrahman Alarifi, AbdulMalik Al-Salman	Visualizing PHPIDS log files for better understanding of web server attacks
IEEE Network Operations and Management Symposium	NOMS	2014	research track paper	Computer Hardware	B	https://ieeexplore.ieee.org/document/6838292/	Ashot N. Harutyunyan , Arnak V. Poghosyan , Naira M. Grigoryan , Mazda A. Marvasti	Abnormality analysis of streamed log data
Security and Communication Networks		2014	journal		Unranked	https://www.scopus.com/inward/record.url?eid=2-s2.0-84911896278&partnerID=40&md5=ee0efab69209672dfe66daeb33d7c778	Xiao, Y., Yue, S., Fu, B., Ozdemir, S.	GlobalView: Building global view with log files in a distributed/networked system for accountability
ACM/IFIP/USENIX International Middleware Conference	Middleware	2014	research track paper	Computer Software	A	https://dl.acm.org/citation.cfm?id=2663319	Saeed Ghanbari, Ali B. Hashemi, Cristiana Amza	Stage-aware anomaly detection through tracking log points	We introduce Stage-aware Anomaly Detection (SAAD), a low-overhead real-time solution for detecting runtime anomalies in storage systems. Modern storage server architectures are multi-threaded and structured as a set of modules, which we call stages. SAAD leverages this to collect stage-level log summaries at runtime and to perform statistical analysis across stage instances. Stages that generate …	We introduce Stage-aware Anomaly Detection (SAAD), a low-overhead real-time solution for detecting runtime anomalies in storage systems.		Modern storage server architectures are multi-threaded and structured as a set of modules, which we call stages. SAAD leverages this to collect stage-level log summaries at runtime and to perform statistical analysis across stage instances. Stages that generate rare execution flows and/or register unusually high duration for regular flows at run-time indicate anomalies.	SAAD makes two key contributions: i) limits the search space for root causes, by pinpointing specific anomalous code stages, and ii) reduces compute and storage requirements for log analysis, while preserving accuracy, through a novel technique based on log summarization. We evaluate SAAD on three distributed storage systems: HBase, Hadoop Distributed File System (HDFS), and Cassandra. We show th…	Ghanbari_2014						1
International Conference on Advances in Social Networks Analysis and Mining		2014	8/2		?	https://dl.acm.org/citation.cfm?id=3191960	Omair Shafiq, Reda Alhajj, Jon G. Rokne	Handling incomplete data using semantic logging based social network analysis hexagon for effective application monitoring and management
International Conference on Future Internet Technologies		2017	7/2		?	https://dl.acm.org/citation.cfm?id=3095788	Hiroshi Abe, Keiichi Shima, Yuji Sekiya, Daisuke Miyamoto, Tomohiro Ishihara, Kazuya Okada	Hayabusa: Simple and Fast Full-Text Search Engine for Massive System Log Data
IEEE International Conference on Cluster Computing	CLUSTER	2014	research track paper	Distributed Computing	A	https://ieeexplore.ieee.org/document/6968768/	Xiaoyu Fu , Rui Ren , Sally A. McKee , Jianfeng Zhan , Ninghui Sun	Digging deeper into cluster system logs for failure prediction and root cause diagnosis	As the sizes of supercomputers and data centers grow towards exascale, failures become normal. System logs play a critical role in the increasingly complex tasks of automatic failure prediction and diagnosis. Many methods for failure prediction are based on analyzing event logs for large scale systems, but there is still neither a widely used one to predict failures based on both non-fatal and fa…	We propose a three-step approach to draw out event dependencies and to identify failure-event generating processes.	As the sizes of supercomputers and data centers grow towards exascale, failures become normal. System logs play a critical role in the increasingly complex tasks of automatic failure prediction and diagnosis. Many methods for failure prediction are based on analyzing event logs for large scale systems, but there is still neither a widely used one to predict failures based on both non-fatal and fa…	First, we cluster frequent event sequences into event groups based on common events. Then we infer causal dependencies between events in each event group. Finally, we extract failure rules based on the observation that events of the same event types, on the same nodes or from the same applications have similar operational behaviors. We use this rich information to improve failure prediction. Our …		Fu_2014									1
International Workshop on Software Engineering for Resilient Systems		2017			?	http://link.springer.com/chapter/10.1007/978-3-319-65948-0_12	Marcin Kubacki, Janusz Sosnowski	Holistic Processing and Exploring Event Logs
Symposium and Bootcamp on the Science of Security		2014			?	https://dl.acm.org/citation.cfm?id=2600185	Lucas Layman, Sylvain David Diffo, Nico Zazworka	Human factors in webserver log file analysis: a controlled experiment on investigating malicious activity
Data and Applications Security and Privacy		2013	16/1		?	http://link.springer.com/chapter/10.1007/978-3-642-39256-6_7	Sean Thorpe, Indrajit Ray, Tyrone Grandison, Abbie Barbir, Robert France	Hypervisor Event Logs as a Source of Consistent Virtual Machine Evidence for Forensic Cloud Investigations
Workshop on Changing landscapes in HPC security		2013			?	https://dl.acm.org/citation.cfm?id=2465812	Orianna DeMasi, Taghrid Samak, David H. Bailey	Identifying HPC codes via performance logs and machine learning
Journal of Information Security and Applications		2018	journal		?	https://www.scopus.com/inward/record.url?eid=2-s2.0-85044103144&partnerID=40&md5=3c6d1babb3d09594d4fa8a7ee5f56941	Parkinson S., Khan S.	Identifying irregularities in security event logs through an object-based Chi-squared test of independence
Communication and Networking		2011	10/1		?	http://link.springer.com/chapter/10.1007/978-3-642-27201-1_40	Joon-Min Gil, Mihye Kim, Ui-Sung Song	Implementation of Log Analysis System for Desktop Grids and Its Application to Resource Group-Based Task Scheduling
International Parallel and Distributed Processing Symposium Workshop		2018	WORKSHOP		?	https://ieeexplore.ieee.org/document/8425454/	Yining Zhao , Xiaodong Wang , Haili Xiao , Xuebin Chi	Improvement of the Log Pattern Extracting Algorithm Using Text Similarity
International Conference on Information Visualisation	IV	2014	research track paper	Artificial Intelligence and Image Processing Design Practice and Management	B	https://ieeexplore.ieee.org/document/6902902/	S. Devaux , F. Bouali , G. Venturini	DataTube4log: A Visual Tool for Mining Multi-threaded Software Logs
IEEE International Conference on Computer Communications	IEEE INFOCOM	2014	research track paper	Distributed Computing	A*	https://ieeexplore.ieee.org/document/6847986/	Tatsuaki Kimura , Keisuke Ishibashi , Tatsuya Mori , Hiroshi Sawada , Tsuyoshi Toyono , Ken Nishimatsu , Akio Watanabe , Akihiro Shimoda , Kohei Shiomoto	Spatio-temporal factorization of log data for understanding network events	Understanding the impacts and patterns of network events such as link flaps or hardware errors is crucial for diagnosing network anomalies. In large production networks, analyzing the log messages that record network events has become a challenging task due to the following two reasons. First, the log messages are composed of unstructured text messages generated by vendor-specific rules. Second, …	In this paper, we have tackled these obstacles by building two novel techniques: statistical template extraction (STE) and log tensor factorization (LTF).	Understanding the impacts and patterns of network events such as link flaps or hardware errors is crucial for diagnosing network anomalies. In large production networks, analyzing the log messages that record network events has become a challenging task due to the following two reasons. First, the log messages are composed of unstructured text messages generated by vendor-specific rules. Second, …	STE leverages a statistical clustering technique to automatically extract primary templates from unstructured log messages. LTF aims to build a statistical model that captures spatial-temporal patterns of log messages. Such spatial-temporal patterns provide useful insights into understanding the impacts and root cause of hidden network events. This paper first formulates our problem in a mathemat…		Kimura_2014								1
Empirical Software Engineering		2013	journal	Computer Software	A	https://www.scopus.com/inward/record.url?eid=2-s2.0-84922001381&partnerID=40&md5=700ec8f7a4205cecc5238a313e8b0e7c		Studying the relationship between logging characteristics and the code quality of platform software	Platform software plays an important role in speeding up the development of large scale applications. Such platforms provide functionalities and abstraction on which applications can be rapidly developed and easily deployed. Hadoop and JBoss are examples of popular open source platform software. Such platform software generate logs to assist operators in monitoring the applications that run on th…	In this paper, we sought to empirically study this [logs and code quality] relation through a case study on four releases of Hadoop and JBoss.	Platform software plays an important role in speeding up the development of large scale applications. Such platforms provide functionalities and abstraction on which applications can be rapidly developed and easily deployed. Hadoop and JBoss are examples of popular open source platform software. Such platform software generate logs to assist operators in monitoring the applications that run on th…		Our findings show that files with logging statements have higher post-release defect densities than those without logging statements in 7 out of 8 studied releases. Inspired by prior studies on code quality, we defined log-related product metrics, such as the number of log lines in a file, and log-related process metrics such as the number of changed log lines. We find that the correlations betwe…	Shang_2013	1
International Workshop on Dynamic Analysis		2007			?	https://dl.acm.org/citation.cfm?id=1270373	Donald J. Yantzi, James H. Andrews	Industrial Evaluation of a Log File Analysis Methodology
IEEE International Symposium on Cluster, Cloud and Grid Computing	CCGrid	2014	research track paper	Distributed Computing	A	https://ieeexplore.ieee.org/document/6846439/	Eunjung Yoon , Anna Squicciarini	Toward Detecting Compromised MapReduce Workers through Log Analysis	MapReduce is a framework for performing data intensive computations in parallel on commodity computers. When MapReduce is carried out in distributed settings, users maintain very little control over these computations, causing several security and privacy concerns. MapReduce activities may be subverted or compromised by malicious or cheating nodes. In this paper, we focus on the analysis and dete…	In this paper, we focus on the analysis and detection of attacks launched by malicious or mis configured nodes, which may tamper with the ordinary functions of the MapReduce framework.	MapReduce is a framework for performing data intensive computations in parallel on commodity computers. When MapReduce is carried out in distributed settings, users maintain very little control over these computations, causing several security and privacy concerns. MapReduce activities may be subverted or compromised by malicious or cheating nodes.	Our goal is to investigate the extent to which integrity and correctness of computation in a MapReduce environments can be verified while introducing no modifications on the original MapReduce operations or introductions of extra operations, neither computational nor cryptographic. We identify a number of data and computation integrity checks against aggregated low-level system traces and Hadoop …		Yoon_2014							1
International Conference on Data and Software Engineering		2014			?	https://ieeexplore.ieee.org/document/7062673/	Jeremy Joseph Hanniel , Tricya E. Widagdo , Yudistira D. W. Asnar	Information system log visualization to monitor anomalous user activity based on time
Procedia Computer Science		2015			?	https://www.sciencedirect.com/science/article/pii/S1877050915004184	Amruta Ambre, Narendra Shekokar	Insider threat detection using log analysis and event correlation
IEEE International Conference on Computer and Information Technology	CIT	2014	research track paper		C	https://ieeexplore.ieee.org/document/6984648/	Janusz R. Getta , Marcin Zimniak , Wolfgang Benn	Mining Periodic Patterns from Nested Event Logs
Advances in Artificial Intelligence: From Theory to Practice		2017	?		?	http://link.springer.com/chapter/10.1007/978-3-319-60045-1_23	Mohamed Cherif Dani, Henri Doreau, Samantha Alt	K-means Application for Anomaly Detection and Log Classification in HPC
Proceedings of the NetDB		2011			?	http://pages.cs.wisc.edu/~akella/CS744/F17/838-CloudPapers/Kafka.pdf	J Kreps, N Narkhede, J Rao	Kafka: A distributed messaging system for log processing
International Conference on Software Technologies	ICSoft	2014	research track paper	Computer Software	B	http://link.springer.com/chapter/10.1007/978-3-319-25579-8_8	Fredrik Abbors, Dragos Truscan, Tanwir Ahmad	Mining Web Server Logs for Creating Workload Models
IEEE/IFIP International Conference on Dependable Systems	DSN	2018	research track paper	Computer Software	A	https://ieeexplore.ieee.org/document/8416513/	Francisco Neves , Nuno Machado , Jose Pereira	Falcon: A Practical Log-Based Analysis Tool for Distributed Systems	Programmers and support engineers typically rely on log data to narrow down the root cause of unexpected behaviors in dependable distributed systems. Unfortunately, the inherently distributed nature and complexity of such distributed executions often leads to multiple independent logs, scattered across different physical machines, with thousands or millions entries poorly correlated in terms of e…	We present Falcon, a tool aimed at making log-based analysis of distributed systems practical and effective.	Programmers and support engineers typically rely on log data to narrow down the root cause of unexpected behaviors in dependable distributed systems. Unfortunately, the inherently distributed nature and complexity of such distributed executions often leads to multiple independent logs, scattered across different physical machines, with thousands or millions entries poorly correlated in terms of e…	Falcon's modular architecture, designed as an extensible pipeline, allows it to seamlessly combine several distinct logging sources and generate a coherent space-time diagram of distributed executions. To preserve event causality, even in the presence of logs collected from independent unsynchronized machines, Falcon introduces a novel happens-before symbolic formulation and relies on an off-the-…	Our case study with the popular distributed coordination service Apache Zookeeper shows that Falcon eases the log-based analysis of complex distributed protocols and is helpful in bridging the gap between protocol design and implementation.	Neves_2018													1
Computation World: Future Computing, Service Computation, Cognitive, Adaptive, Content, Patterns		2009	8/2		?	https://ieeexplore.ieee.org/document/5359624/	Nabil Hammoud	LEC: Log Event Correlation Architecture Based on Continuous Query
International Conference on Software Engineering	ICSE	2000	research track paper	Computer Software	A*	https://dl.acm.org/citation.cfm?id=337194	James H. Andrews, Yingjun Zhang	Broad-spectrum studies of log file analysis	This paper reports on research into applying the technique of log file analysis for checking test results to a broad range of testing and other tasks. The studies undertaken included applying log file analysis to both unit- and system-level testing and to requirements of both safety-critical and non-critical systems, and the use of log file analysis in combination with other testing methods. The …	This paper reports on research into applying the technique of log file analysis for checking test results to a broad range of testing and other tasks.		The studies undertaken included applying log file analysis to both unit- and system-level testing and to requirements of both safety-critical and non-critical systems, and the use of log file analysis in combination with other testing methods. The paper also reports on the technique of using log file analyzers to simulate the software under test, both in order to validate the analyzers and to cla…		Andrews_2000										1
International Symposium on Formal Methods	FM	2014	research track paper	Computation Theory and Mathematics	A	https://link.springer.com/chapter/10.1007/978-3-319-06410-9_12	Denis Butin, Daniel Le Métayer	Log analysis for data protection accountability	Accountability is increasingly recognised as a cornerstone of data protection, notably in European regulation, but the term is frequently used in a vague sense. For accountability to bring tangible benefits, the expected properties of personal data handling logs (used as “accounts”) and the assumptions regarding the logging process must be defined with accuracy. In this paper, we provide a formal…	In this paper, we provide a formal framework for accountability (...)	Accountability is increasingly recognised as a cornerstone of data protection, notably in European regulation, but the term is frequently used in a vague sense. For accountability to bring tangible benefits, the expected properties of personal data handling logs (used as “accounts”) and the assumptions regarding the logging process must be defined with accuracy.	(...) show the correctness of the log analysis with respect to abstract traces used to specify privacy policies. We also show that compliance with respect to data protection policies can be checked based on logs free of personal data, and describe the integration of our formal framework in a global accountability process.		Butin_2014							1
Science China Information Sciences		2012			?	https://www.scopus.com/inward/record.url?eid=2-s2.0-84871752053&partnerID=40&md5=9d921d9930bc6229563775f5d38ccbf1	Mi, H.B., Wang, H.M., Zhou, Y.F., Lyu, M.R., Cai, H.	Localizing root causes of performance anomalies in cloud computing systems by analyzing request trace logs
Large Installation System Administration Conference	LISA	2010			?	https://www.usenix.org/legacy/events/lisa10/tech/full_papers/lisa10_proceedings.pdf#page=155	Paul Krizak	Log Analysis and Event Correlation Using Variable Temporal Event Correlator (VTEC).
SIAM International Conference on Data Mining	SDM	2014	research track paper	Data Format	A	https://www.scopus.com/inward/record.url?eid=2-s2.0-84959911106&partnerID=40&md5=37f2d607ae29ce605111ec6c60895378	Gao, Y., Zhou, W., Zhang, Z., Han, J., Meng, D., Xu, Z.	Online anomaly detection by improved grammar compression of log sequences	Nowadays, log sequences mining techniques are widely used in detecting anomalies for Internet services. The state-ofthe-art anomaly detection methods either need significant computational costs, or require specific assumptions that the test logs are holding certain data distribution patterns in order to be effective. Therefore, it is very difficult to achieve real time responses and it greatly re…	To address these issues, we propose an innovative anomaly detection strategy called CADM.	Nowadays, log sequences mining techniques are widely used in detecting anomalies for Internet services. The state-ofthe-art anomaly detection methods either need significant computational costs, or require specific assumptions that the test logs are holding certain data distribution patterns in order to be effective. Therefore, it is very difficult to achieve real time responses and it greatly re…	In CADM, the relative entropy between test logs and normal logs is exploited to discover the anomalous levels. Instead of calculating the relative entropy based on certain predefined data distribution models, our solution inspects the relationship between relative entropy and compression size with an improved grammar-based compression method. No assumptions are needed. In addition, our mechanism …	Experimental analysis with both synthetic and real world logs proves that CADM is superior to the other methods. It can achieve very high anomaly detection accuracy with the minimal computational overhead. It is suitable for log mining tasks and can be applied on a broad variety of application fields.	Gao_2014						1
Computer Networks		2015	journal	Distributed Computing	A	https://www.sciencedirect.com/science/article/pii/S1389128615002650	Antti Juvonen, Tuomo Sipola, Timo Hämäläinen	Online anomaly detection using dimensionality reduction techniques for HTTP log analysis	Modern web services face an increasing number of new threats. Logs are collected from almost all web servers, and for this reason analyzing them is beneficial when trying to prevent intrusions. Intrusive behavior often differs from the normal web traffic. This paper proposes a framework to find abnormal behavior from these logs. We compare random projection, principal component analysis and diffu…	This paper proposes a framework to find abnormal behavior from these logs.	Modern web services face an increasing number of new threats. Logs are collected from almost all web servers, and for this reason analyzing them is beneficial when trying to prevent intrusions. Intrusive behavior often differs from the normal web traffic.	We compare random projection, principal component analysis and diffusion map for anomaly detection. In addition, the framework has online capabilities. The first two methods have intuitive extensions while diffusion map uses the Nyström extension. This fast out-of-sample extension enables real-time analysis of web server traffic. The framework is demonstrated using real-world network log data. Ac…	These results are useful when designing next generation intrusion detection systems. The presented approach finds intrusions from high-dimensional datasets in real time.	Juvonen_2015						1
Empirical Software Engineering		2015	journal	Computer Software	A	https://www.scopus.com/inward/record.url?eid=2-s2.0-84930485160&partnerID=40&md5=7174103f09c6fce1ef61ba0f17eef5b4	Russo, B., Succi, G., Pedrycz, W.	Mining system logs to learn error predictors: a case study of a telemetry system	Predicting system failures can be of great benefit to managers that get a better command over system performance. Data that systems generate in the form of logs is a valuable source of information to predict system reliability. As such, there is an increasing demand of tools to mine logs and provide accurate predictions. However, interpreting information in logs poses some challenges. This study …	This study discusses how to effectively mining sequences of logs and provide correct predictions.	Predicting system failures can be of great benefit to managers that get a better command over system performance. Data that systems generate in the form of logs is a valuable source of information to predict system reliability. As such, there is an increasing demand of tools to mine logs and provide accurate predictions. However, interpreting information in logs poses some challenges.	The approach integrates different machine learning techniques to control for data brittleness, provide accuracy of model selection and validation, and increase robustness of classification results. We apply the proposed approach to log sequences of 25 different applications of a software system for telemetry and performance of cars. On this system, we discuss the ability of three well-known suppo…	Our results show that a good analysis strategy provides stable, accurate predictions. Such strategy must at least require high fitting ability of models used for prediction. We demonstrate that such models give excellent predictions both on individual applications - e.g., 1 % false positive rate, 94 % true positive rate, and 95 % precision - and across system applications - on average, 9 % false …	Russo_2015									1
International Workshop on Sustainable Ultrascale Computing Systems		2015			?	https://e-archivo.uc3m.es/handle/10016/21995	Mavridis Ilias, Karatza Eleni	Log file analysis in cloud with Apache Hadoop and Apache Spark
Advances in Digital Forensics IX		2013	?		?	http://link.springer.com/chapter/10.1007/978-3-642-41148-9_10	Gregory Bosman, Stefan Gruner	Log File Analysis with Context-Free Grammars
Journal of Telecommunications and Information Technology		2015	journal		C	https://www.scopus.com/inward/record.url?eid=2-s2.0-84952882662&partnerID=40&md5=483c5ab9eeb4ef6ca185c6308b611958	Malec, P., Piwowar, A., Kozakiewicz, A., Lasota, K.	Detecting security violations based on multilayered event log processing
Symposium and Bootcamp on the Science of Security		2014			?	https://dl.acm.org/citation.cfm?id=2600183	Jason King, Laurie Williams	Log your CRUD: design principles for software logging mechanisms
IEEE International Conference on Trust, Security and Privacy in Computing and Communications	TrustCom	2015	research track paper	Computer Software	A	https://ieeexplore.ieee.org/document/7345288/	Daniel Gonçalves , João Bota , Miguel Correia	Big Data Analytics for Detecting Host Misbehavior in Large Logs	The management of complex network infrastructures continues to be a difficult endeavor today. These infrastructures can contain a huge number of devices that may misbehave in unpredictable ways. Many of these devices keep logs that contain valuable information about the infrastructures' security, reliability, and performance. However, extracting information from that data is far from trivial. The…	The paper presents a novel approach to assess the security of such an infrastructure using its logs, inspired on data from a real telecommunications network.	The management of complex network infrastructures continues to be a difficult endeavor today. These infrastructures can contain a huge number of devices that may misbehave in unpredictable ways. Many of these devices keep logs that contain valuable information about the infrastructures' security, reliability, and performance. However, extracting information from that data is far from trivial.	We use machine learning and data mining techniques to analyze the data and semi-automatically discover misbehaving hosts, without having to instruct the system about how hosts misbehave.		Goncalves_2015							1
Operating Systems Review		2011			?	https://dl.acm.org/citation.cfm?id=1945034	Shimin Chen, Phillip B. Gibbons, Michael Kozuch, Todd C. Mowry	Log-based architectures: using multicore to help software behave correctly
International Conference on Big Data Computing Service and Applications		2018	6/2		?	https://ieeexplore.ieee.org/document/8405724/	Vaibhav Agrawal , Devanjal Kotia , Kamelia Moshirian , Mihui Kim	Log-Based Cloud Monitoring System for OpenStack
Innovative Technologies for Dependable OTS-Based Critical Systems		2013	13/1		?	http://link.springer.com/chapter/10.1007/978-88-470-2772-5_15	Antonio Pecchia, Marcello Cinque	Log-Based Failure Analysis of Complex Systems: Methodology and Relevant Applications
IEEE International Symposium on Cluster, Cloud and Grid Computing	CCGrid	2015	research track paper	Distributed Computing	A	https://ieeexplore.ieee.org/document/7152468/	Hao Lin , Jingyu Zhou , Bin Yao , Minyi Guo , Jie Li	Cowic: A Column-Wise Independent Compression for Log Stream Analysis	Nowadays massive log streams are generated from many Internet and cloud services. Storing log streams consumes a large amount of disk space and incurs high cost. Traditional compression methods can be applied to reduce storage cost, but are inefficient for log analysis, because fetching relevant log entries from compressed data often requires retrieval and decompression of large blocks of data. W…	We propose a column-wise compression approach for well-formatted log streams, where each log entry can be independently compressed or decompressed for analysis.	Nowadays massive log streams are generated from many Internet and cloud services. Storing log streams consumes a large amount of disk space and incurs high cost. Traditional compression methods can be applied to reduce storage cost, but are inefficient for log analysis, because fetching relevant log entries from compressed data often requires retrieval and decompression of large blocks of data.	Specifically, we separate a log entry into several columns and compress each column with different models. We have implemented our approach as a library and integrated it into two applications, a log search system and a log joining system.	Experimental results show that our compression scheme outperforms traditional compression methods for decompression times and has a competitive compression ratio. For log search, our approach achieves better query times than using traditional compression algorithms for both in-core and out-of-core cases. For joining log streams, our approach achieves the same join quality with only 30% memory of …	Lin_2015					1
SPEC International Conference on Performance Engineering		2018			?	https://dl.acm.org/citation.cfm?id=3184416	Kundi Yao, Guilherme B. de Pádua, Weiyi Shang, Steve Sporea, Andrei Toma, Sarah Sajedi	Log4Perf: Suggesting Logging Locations for Web-based Systems' Performance Monitoring
IEEE International Conference on Software Maintenance and Evolution	ICSME	2014	research track paper	Computer Software	A	https://ieeexplore.ieee.org/document/6976068/	Weiyi Shang , Meiyappan Nagappan , Ahmed E. Hassan , Zhen Ming Jiang	Understanding Log Lines Using Development Knowledge	Logs are generated by output statements that developers insert into the code. By recording the system behaviour during runtime, logs play an important role in the maintenance of large software systems. The rich nature of logs has introduced a new market of log management applications (e.g., Splunk, XpoLog and log stash) that assist in storing, querying and analyzing logs. Moreover, recent researc…	Hence in this paper we propose an on-demand approach, which associates the development knowledge present in various development repositories (e.g., code commits and issues reports) with the log lines.	Logs are generated by output statements that developers insert into the code. By recording the system behaviour during runtime, logs play an important role in the maintenance of large software systems. The rich nature of logs has introduced a new market of log management applications (e.g., Splunk, XpoLog and log stash) that assist in storing, querying and analyzing logs. Moreover, recent researc…	By spending over 100 human hours and manually examining all the email threads in the mailing list for three open source systems (Hadoop, Cassandra and Zookeeper) and performing web search on sampled logging statements, we found 15 email inquiries and 73 inquiries from web search about different log lines. We identified that five types of development knowledge that are often sought from the logs b…	Our case studies show that the derived development knowledge can be used to resolve real-life inquiries about logs.	Shang_2014	1
International Conference on Software Engineering	ICSE	2014	research track paper	Computer Software	A*	https://dl.acm.org/citation.cfm?id=2568246	Ivan Beschastnikh, Yuriy Brun, Michael D. Ernst, Arvind Krishnamurthy	Inferring models of concurrent systems from logs of their behavior with CSight	Concurrent systems are notoriously difficult to debug and understand. A common way of gaining insight into system behavior is to inspect execution logs and documentation. Unfortunately, manual inspection of logs is an arduous process, and documentation is often incomplete and out of sync with the implementation. To provide developers with more insight into concurrent systems, we developed CSight.…	To provide developers with more insight into concurrent systems, we developed CSight.	Concurrent systems are notoriously difficult to debug and understand. A common way of gaining insight into system behavior is to inspect execution logs and documentation. Unfortunately, manual inspection of logs is an arduous process, and documentation is often incomplete and out of sync with the implementation.	CSight mines logs of a system's executions to infer a concise and accurate model of that system's behavior, in the form of a communicating finite state machine (CFSM). Engineers can use the inferred CFSM model to understand complex behavior, detect anomalies, debug, and increase confidence in the correctness of their implementations. CSight's only requirement is that the logged events have vector…	Our evaluation finds that CSight infers accurate models that can help developers find bugs.	Beschastnikh_2014											1
CEUR Workshop Proceedings		2015	15/1		?	https://www.scopus.com/inward/record.url?eid=2-s2.0-84962514621&partnerID=40&md5=957356863c396441f77e6823b37b485d	Heikkinen, E., Hämäläinen, T.D.	LOGDIG log file analyzer for mining expected behavior from log files
Journal of Control Engineering and Applied Informatics		2014	journal		?	http://ceai.srait.ro/index.php?journal=ceai&page=article&op=view&path%5B%5D=2181&path%5B%5D=0	Alecsandru Patrascu, Victor-Valeriu Patriciu	Logging system for cloud computing forensic environments
International Conference on Software Engineering	ICSE	2014	industry track paper	Computer Software	A*	https://dl.acm.org/citation.cfm?id=2591175	Qiang Fu, Jieming Zhu, Wenlu Hu, Jian-Guang Lou, Rui Ding, Qingwei Lin, Dongmei Zhang, Tao Xie	Where do developers log? an empirical study on logging practices in industry	System logs are widely used in various tasks of software system management. It is crucial to avoid logging too little or too much. To achieve so, developers need to make informed decisions on where to log and what to log in their logging practices during development. However, there exists no work on studying such logging practices in industry or helping developers make informed decisions. To fill…	To fill this significant gap, in this paper, we systematically study the logging practices of developers in industry, with focus on where developers log.	System logs are widely used in various tasks of software system management. It is crucial to avoid logging too little or too much. To achieve so, developers need to make informed decisions on where to log and what to log in their logging practices during development. However, there exists no work on studying such logging practices in industry or helping developers make informed decisions.	We obtain six valuable findings by conducting source code analysis on two large industrial systems (2.5M and 10.4M LOC, respectively) at Microsoft. We further validate these findings via a questionnaire survey with 54 experienced developers in Microsoft.	In addition, our study demonstrates the high accuracy of up to 90% F-Score in predicting where to log.	Fu_2014a			1
International Symposium on Software Reliability Engineering	ISSRE	2015	industry track paper	Computer Software	A	https://www.scopus.com/inward/record.url?eid=2-s2.0-84964815259&partnerID=40&md5=ff61aeb461250ade4b672ec72445a5a3	Farshchi, M., Schneider, J.-G., Weber, I., Grundy, J.	Experience report: Anomaly detection of cloud application operations using log and cloud metric correlation analysis	Failure of application operations is one of the main causes of system-wide outages in cloud environments. This particularly applies to DevOps operations, such as backup, redeployment, upgrade, customized scaling, and migration that are exposed to frequent interference from other concurrent operations, configuration changes, and resources failure. However, current practices fail to provide a relia…	In this paper, we present an approach to address this problem that adopts a regression-based analysis technique to find the correlation between an operation's activity logs and the operation activity's effect on cloud resources.	Failure of application operations is one of the main causes of system-wide outages in cloud environments. This particularly applies to DevOps operations, such as backup, redeployment, upgrade, customized scaling, and migration that are exposed to frequent interference from other concurrent operations, configuration changes, and resources failure. However, current practices fail to provide a relia…	The correlation model is then used to derive assertion specifications, which can be used for runtime verification of running operations and their impact on resources. We evaluated our proposed approach on Amazon EC2 with 22 rounds of rolling upgrade operations while other types of operations were running and random faults were injected.	Our experiment shows that our approach successfully managed to raise alarms for 115 random injected faults, with a precision of 92.3%.	Farshchi_2015						1
IEEE International Symposium on Parallel and Distributed Processing with Applications	ISPA	2015	research track paper	Distributed Computing	B	https://ieeexplore.ieee.org/document/7345629/	Nentawe Gurumdimma , Arshad Jhumka , Maria Liakata , Edward Chuah , James Browne	Towards Increasing the Error Handling Time Window in Large-Scale Distributed Systems Using Console and Resource Usage Logs
ACM International Conference on Information and Knowledge Management	CIKM	2016	research track paper	Information Systems Artificial Intelligence and Image Processing Library and Information Studies	A	https://dl.acm.org/citation.cfm?id=2983358	Hossein Hamooni, Biplob Debnath, Jianwu Xu, Hui Zhang, Guofei Jiang, Abdullah Mueen	LogMine: Fast Pattern Recognition for Log Analytics	Modern engineering incorporates smart technologies in all aspects of our lives. Smart technologies are generating terabytes of log messages every day to report their status. It is crucial to analyze these log messages and present usable information (e.g. patterns) to administrators, so that they can manage and monitor these technologies. Patterns minimally represent large groups of log messages a…	We propose a method, named LogMine, that extracts high quality patterns for a given set of log messages.	Although patterns exist commonly in automated log messages, recognizing them in massive set of log messages from heterogeneous sources without any prior information is a significant undertaking.	LogMine is implemented in map-reduce framework for distributed platforms to process millions of log messages in seconds. LogMine is a robust method that works for heterogeneous log messages generated in a wide variety of systems. Our method exploits algorithmic techniques to minimize the computational overhead based on the fact that log messages are always automatically generated. We evaluate the…	LogMine has successfully generated patterns which are as good as the patterns generated by exact and unscalable method, while achieving a 500× speedup. Finally, we describe three applications of the patterns generated by LogMine in monitoring large scale industrial systems.	Hamooni_2016				1
International Conference on Big Data		2016	10/2		?	https://ieeexplore.ieee.org/document/7840748/	Ruoyu Wang , Daniel Sun , Guoqiang Li , Muhammad Atif , Surya Nepal	LogProv: Logging events as provenance of big data analytics pipelines with trustworthiness
ACM International Conference on Knowledge Discovery and Data Mining	KDD	2016	research track paper	Data Format	A*	https://dl.acm.org/citation.cfm?id=2939712	Animesh Nandi, Atri Mandal, Shubham Atreja, Gargi B. Dasgupta, Subhrajit Bhattacharya	Anomaly Detection Using Program Control Flow Graph Mining From Execution Logs	We focus on the problem of detecting anomalous run-time behavior of distributed applications from their execution logs. Specifically we mine templates and template sequences from logs to form a control flow graph (cfg) spanning distributed components. This cfg represents the baseline healthy system state and is used to flag deviations from the expected behavior of runtime logs. The novelty in our…	We focus on the problem of detecting anomalous run-time behavior of distributed applications from their execution logs.		Specifically we mine templates and template sequences from logs to form a control flow graph (cfg) spanning distributed components. This cfg represents the baseline healthy system state and is used to flag deviations from the expected behavior of runtime logs. The novelty in our work stems from the new techniques employed to: (1) overcome the instrumentation requirements or application specific a…	Results demonstrate that our template mining, cfg mining, and anomaly detection algorithms have high accuracy. The distributed implementation of our pipeline is highly scalable and has more than 500 GB/day of log data processing capability even on a 10 low-end VM based (Spark + Hadoop) cluster.	Nandi_2016						1
International Journal of Simulation and Process Modelling		2016	journal		C	https://www.scopus.com/inward/record.url?eid=2-s2.0-84989955714&partnerID=40&md5=853056c9ef5c43060ea0c33c5fd3eaed	Chen, J., Zhu, L., Guo, Y., Huang, R., Cai, S., Zhao, X.	A mining approach for component abnormal information based on monitor log
ACM Transactions on Storage		2016	journal	Data Format	B	https://dl.acm.org/citation.cfm?id=2846101	Jayanta Basak, P. C. Nagesh	A User-Friendly Log Viewer for Storage Systems
Computing		2016	journal	Information and Computing Sciences Mathematical Sciences	A	https://www.scopus.com/inward/record.url?eid=2-s2.0-84952056410&partnerID=40&md5=67cd31322a861f6b2ed08b95ff021352	Balliu, A., Olivetti, D., Babaoglu, O., Marzolla, M., Sîrbu, A.	A Big Data analyzer for large trace logs	Current generation of Internet-based services are typically hosted on large data centers that take the form of warehouse-size structures housing tens of thousands of servers. Continued availability of a modern data center is the result of a complex orchestration among many internal and external actors including computing hardware, multiple layers of intricate software, networking and storage devi…	This paper presents Big Data analyzer (BiDAl), a prototype Java tool for log-data analysis that incorporates several Big Data technologies in order to simplify the task of extracting information from data traces produced by large clusters and server farms.	During the course of [large data center] operation, many of these components produce large amounts of data in the form of event and error logs that are essential not only for identifying and resolving problems but also for improving data center efficiency and management. Most of these activities would benefit significantly from data analytics techniques to exploit hidden statistical patterns and …			Balliu_2015													1
Workshop on Artificial Intelligence and Security		2015			?	https://dl.acm.org/citation.cfm?id=2808773	Konstantin Berlin, David Slater, Joshua Saxe	Malicious Behavior Detection using Windows Audit Logs
International Conference on Software Analysis, Evolution, and Reengineering	SANER	2016	research track paper	Computer Software	C	https://ieeexplore.ieee.org/document/7476654/	Suhas Kabinna , Weiyi Shang , Cor-Paul Bezemer , Ahmed E. Hassan	Examining the Stability of Logging Statements	Logging statements produce logs that assist in understanding system behavior, monitoring choke-points and debugging. Prior research demonstrated the importance of logging statements in operating, understanding and improving software systems. The importance of logs has lead to a new market of log management and processing tools. However, logs are often unstable, i.e., the logging statements that g…
International Workshop on HPC User Support Tools		2017			?	https://dl.acm.org/citation.cfm?id=3152559	Abida Haque, Alexandra DeLucia, Elisabeth Baseman	Markov Chain Modeling for Anomaly Detection in High Performance Computing System Logs
Advances in Transdisciplinary Engineering		2015	10/1		?	https://www.scopus.com/inward/record.url?eid=2-s2.0-84959289596&partnerID=40&md5=42a1c5cea5cb5fea3f2ae272f2657633	Shen, G., Luo, F., Hong, G.	Measuring and evaluating source code logs using static code analyzer
International Conference on Software Engineering	ICSE	2015	industry track paper	Computer Software	A*	https://dl.acm.org/citation.cfm?id=2819035	Antonio Pecchia, Marcello Cinque, Gabriella Carrozza, Domenico Cotroneo	Industry practices and event logging: assessment of a critical software development process	Practitioners widely recognize the importance of event logging for a variety of tasks, such as accounting, system measurements and troubleshooting. Nevertheless, in spite of the importance of the tasks based on the logs collected under real workload conditions, event logging lacks systematic design and implementation practices. The implementation of the logging mechanism strongly relies on the hu…	This paper proposes a measurement study of event logging practices in a critical industrial domain.	Practitioners widely recognize the importance of event logging for a variety of tasks, such as accounting, system measurements and troubleshooting. Nevertheless, in spite of the importance of the tasks based on the logs collected under real workload conditions, event logging lacks systematic design and implementation practices. The implementation of the logging mechanism strongly relies on the hu…	We assess a software development process at Selex ES, a leading Finmeccanica company in electronic and information solutions for critical systems. Our study combines source code analysis, inspection of around 2.3 millions log entries, and direct feedback from the development team to gain process-wide insights ranging from programming practices, logging objectives and issues impacting log analysis.	The findings of our study were extremely valuable to prioritize event logging reengineering tasks at Selex ES.	Pecchia_2015	1
Large Installation System Administration Conference	LISA	2002			?	https://www.usenix.org/event/lisa02/tech/full_papers/takada/takada_html/	Tetsuji Takada, Hideki Koike	MieLog: A Highly Interactive Visual Log Browser Using Information Visualization and Statistical Analysis.
IEEE European Symposium on Security and Privacy	EuroS&P	2018	16/2	Computer Software Computation Theory and Mathematics	New	https://ieeexplore.ieee.org/document/8406589/	Carlos Cotrini , Thilo Weghorn , David Basin	Mining ABAC Rules from Sparse Logs
IEEE International Working Conference on Mining Software Repositories	MSR	2016	research track paper	Data Format Computer Software	A	https://dl.acm.org/citation.cfm?id=2901769	Suhas Kabinna, Cor-Paul Bezemer, Weiyi Shang, Ahmed E. Hassan	Logging library migrations: a case study for the apache software foundation projects	Developers leverage logs for debugging, performance monitoring and load testing. The increased dependence on logs has lead to the development of numerous logging libraries which help developers in logging their code. As new libraries emerge and current ones evolve, projects often migrate from an older library to another one. In this paper we study logging library migrations within Apache Software…	In this paper we study logging library migrations within Apache Software Foundation (ASF) projects.	Developers leverage logs for debugging, performance monitoring and load testing. The increased dependence on logs has lead to the development of numerous logging libraries which help developers in logging their code. As new libraries emerge and current ones evolve, projects often migrate from an older library to another one.		From our manual analysis of JIRA issues, we find that 33 out of 223 (i.e., 14%) ASF projects have undergone at least one logging library migration. We find that the five main drivers for logging library migration are: 1) to increase flexibility (i.e., the ability to use different logging libraries within a project) 2) to improve performance, 3) to reduce effort spent on code maintenance, 4) to re…	Kabinna_2016	1
Transactions on Network and Service Management		2018	journal		?	https://ieeexplore.ieee.org/document/8122062/	Satoru Kobayashi , Kazuki Otomo , Kensuke Fukuda , Hiroshi Esaki	Mining Causality of Network Events in Log Data
Operating Systems Review		2010			?	https://dl.acm.org/citation.cfm?id=1740411	Jian-Guang Lou, Qiang Fu, Yi Wang, Jiang Li	Mining dependency in distributed systems through unstructured logs analysis
Journal of Information Processing		2016	journal	Information and Computing Sciences	C	https://www.scopus.com/inward/record.url?eid=2-s2.0-84978371359&partnerID=40&md5=95dd3e25fca1003eb9daceeb17c10bc8	Ono, Y., Sakurai, K., Yamane, S.	LogChamber: Inferring source code locations corresponding to mobile applications run-time logs
International Conference on Architectural Support for Programming Languages and Operating Systems	ASPLOS	2016	research track paper	Computer Software	A*	https://dl.acm.org/citation.cfm?id=2872407	Xiao Yu, Pallavi Joshi, Jianwu Xu, Guoliang Jin, Hui Zhang, Guofei Jiang	CloudSeer: Workflow Monitoring of Cloud Infrastructures via Interleaved Logs	Cloud infrastructures provide a rich set of management tasks that operate computing, storage, and networking resources in the cloud. Monitoring the executions of these tasks is crucial for cloud providers to promptly find and understand problems that compromise cloud availability. However, such monitoring is challenging because there are multiple distributed service components involved in the exe…	CloudSeer enables effective workflow monitoring.	Cloud infrastructures provide a rich set of management tasks that operate computing, storage, and networking resources in the cloud. Monitoring the executions of these tasks is crucial for cloud providers to promptly find and understand problems that compromise cloud availability. However, such monitoring is challenging because there are multiple distributed service components involved in the exe…	It takes a lightweight non-intrusive approach that purely works on interleaved logs widely existing in cloud infrastructures. CloudSeer first builds an automaton for the workflow of each management task based on normal executions, and then it checks log messages against a set of automata for workflow divergences in a streaming manner. Divergences found during the checking process indicate potenti…	Our experiments on OpenStack, a popular open-source cloud infrastructure, show that CloudSeer's efficiency and problem-detection capability are suitable for online monitoring.	Yu_2016													1
European Dependable Computing Conference	EDCC	2014	8/2	Other Information and Computing Sciences Information Systems	Unranked	https://ieeexplore.ieee.org/document/6821088/	Santonu Sarkar , Rajeshwari Ganesan , Marcello Cinque , Flavio Frattini , Stefano Russo , Agostino Savignano	Mining Invariants from SaaS Application Logs (Practical Experience Report)
Managing Large-scale Systems via the Analysis of System Logs and the Application of Machine Learning Techniques	SLAM	2011	workshop paper		?	https://dl.acm.org/citation.cfm?id=2038638	Stefan Weigert, Matti Hiltunen, Christof Fetzer	Mining large distributed log data in near real time
SIGKDD Explorations Newsletter - Natural language processing and text mining: Volume 7 Issue 1, June		2005			?	https://dl.acm.org/citation.cfm?id=1089822	Wei Peng, Tao Li, Sheng Ma	Mining logs files for data-driven system management
International Conference on Web-Age Information Management	WAIM	2016	research track paper	Information Systems	C	http://link.springer.com/chapter/10.1007/978-3-319-39958-4_13	Jinwei Guo, Chendong Zhang, Peng Cai, Minqi Zhou, Aoying Zhou	Low Overhead Log Replication for Main Memory Database System
IEEE International Symposium on Parallel and Distributed Processing with Applications	ISPA	2016	research track paper	Distributed Computing	B	https://www.scopus.com/inward/record.url?eid=2-s2.0-85015198781&partnerID=40&md5=b2f7f0fdb530c9d3a0df6056943bacb9	Feng, B., Wu, C., Li, J.	MLC: An efficient multi-level log compression method for cloud backup systems
International Symposium on Integrated Network Management		2011			?	https://ieeexplore.ieee.org/document/5990536/	Thomas Reidemeister , Miao Jiang , Paul A.S. Ward	Mining unstructured log files for recurrent fault diagnosis
IEEE International Symposium on Parallel and Distributed Processing with Applications	ISPA	2016	research track paper	Distributed Computing	B	https://www.scopus.com/inward/record.url?eid=2-s2.0-85015203510&partnerID=40&md5=69ac802a9b0c75ba99c003daa0f83abc	Xu, Y., Hou, Z.	NVM-assisted non-redundant logging for android systems
International Conference on Software Engineering	ICSE	2015	research track paper	Computer Software	A*	https://dl.acm.org/citation.cfm?id=2818807	Jieming Zhu, Pinjia He, Qiang Fu, Hongyu Zhang, Michael R. Lyu, Dongmei Zhang	Learning to log: helping developers make informed logging decisions	Logging is a common programming practice of practical importance to collect system runtime information for postmortem analysis. Strategic logging placement is desired to cover necessary runtime information without incurring unintended consequences (e.g., performance overhead, trivial logs). However, in current practice, there is a lack of rigorous specifications for developers to govern their log…	To reduce the effort on making logging decisions, in this paper, we propose a "learning to log" framework, which aims to provide informative guidance on logging during development.	Logging is a common programming practice of practical importance to collect system runtime information for postmortem analysis. Strategic logging placement is desired to cover necessary runtime information without incurring unintended consequences (e.g., performance overhead, trivial logs). However, in current practice, there is a lack of rigorous specifications for developers to govern their log…	As a proof of concept, we provide the design and implementation of a logging suggestion tool, LogAdvisor, which automatically learns the common logging practices on where to log from existing logging instances and further leverages them for actionable suggestions to developers. Specifically, we identify the important factors for determining where to log and extract them as structural features, te…	The encouraging experimental results, as well as a user study, demonstrate the feasibility and effectiveness of our logging suggestion tool. We believe our work can serve as an important first step towards the goal of "learning to log".	Zhu_2015			1
IEEE Software		2016	journal	Computer Software	B	https://ieeexplore.ieee.org/document/7412635/	Andriy Miranskyy , Abdelwahab Hamou-Lhadj , Enzo Cialini , Alf Larsson	Operational-Log Analysis for Big Data Systems: Challenges and Solutions
International Symposium on Modeling, Analysis and Simulation of Computer and Telecommunication Systems	MASCOTS	2016	research track paper	Computer Hardware	A	https://ieeexplore.ieee.org/document/7774577/	Mahmoud Awad , Daniel A. Menascé	Performance Model Derivation of Operational Systems through Log Analysis	Manually developing analytic performance models of operational systems can be challenging, time consuming, and costly. This paper describes a method that uses system logs and configuration files to automatically derive analytic performance models of operational systems. The method described here automatically determines: (1) the system software servers, (2) the system devices, (3) the deployment …	This paper describes a method that uses system logs and configuration files to automatically derive analytic performance models of operational systems.	Manually developing analytic performance models of operational systems can be challenging, time consuming, and costly.		The results showed that the method is capable of deriving the workload model and system model by parsing the system configuration files and log files and inferring user-system interaction patterns and client-server interaction diagrams.	Awad_2016											1
International Symposium on Reliable Distributed Systems	SRDS	2016	research track paper	Distributed Computing	A	https://ieeexplore.ieee.org/document/7794329/	Nentawe Gurumdimma , Arshad Jhumka , Maria Liakata , Edward Chuah , James Browne	CRUDE: Combining Resource Usage Data and Error Logs for Accurate Error Detection in Large-Scale Distributed Systems	The use of console logs for error detection in large scale distributed systems has proven to be useful to system administrators. However, such logs are typically redundant and incomplete, making accurate detection very difficult. In an attempt to increase this accuracy, we complement these incomplete console logs with resource usage data, which captures the resource utilisation of every job in th…	We then develop a novel error detection methodology, the CRUDE approach, that makes use of both the resource usage data and console logs.	The use of console logs for error detection in large scale distributed systems has proven to be useful to system administrators. However, such logs are typically redundant and incomplete, making accurate detection very difficult.	In an attempt to increase this accuracy, we complement these incomplete console logs with resource usage data, which captures the resource utilisation of every job in the system. We thus make the following specific technical contributions: we develop (i) a clustering algorithm to group nodes with similar behaviour, (ii) an anomaly detection algorithm to identify jobs with anomalous resource usage…	Our results are positive: (i) our approach detects errors with a true positive rate of about 80%, and (ii) when compared with the well-known Nodeinfo error detection algorithm, our algorithm provides an average improvement of around 85% over Nodeinfo, with a best-case improvement of 250%.	Gurumdimma_2016								1
International Symposium on Software Reliability Engineering	ISSRE	2016	industry track paper	Computer Software	A	https://ieeexplore.ieee.org/document/7774521/	Shilin He , Jieming Zhu , Pinjia He , Michael R. Lyu	Experience Report: System Log Analysis for Anomaly Detection	Anomaly detection plays an important role in management of modern large-scale distributed systems. Logs, which record system runtime information, are widely used for anomaly detection. Traditionally, developers (or operators) often inspect the logs manually with keyword search and rule matching. The increasing scale and complexity of modern systems, however, make the volume of logs explode, which…	To address these problems, we provide a detailed review and evaluation of six state-of-the-art log-based anomaly detection methods, including three supervised methods and three unsupervised methods, and also release an open-source toolkit allowing ease of reuse.	Anomaly detection plays an important role in management of modern large-scale distributed systems. Logs, which record system runtime information, are widely used for anomaly detection. Traditionally, developers (or operators) often inspect the logs manually with keyword search and rule matching. The increasing scale and complexity of modern systems, however, make the volume of logs explode, which…	These methods have been evaluated on two publicly-available production log datasets, with a total of 15,923,592 log messages and 365,298 anomaly instances.	We believe that our work, with the evaluation results as well as the corresponding findings, can provide guidelines for adoption of these methods and provide references for future development.	He_2016a						1
International Conference on Big Data Computing Service and Applications		2018	7/2		?	https://ieeexplore.ieee.org/document/8405707/	Junior Dongo , Charif Mahmoudi , Fabrice Mourlin	NDN Log Analysis Using Big Data Techniques: NFD Performance Assessment
Security, Privacy, and Anonymity in Computation, Communication, and Storage		2017			?	http://link.springer.com/chapter/10.1007/978-3-319-72395-2_19	Kai Ma, Rong Jiang, Mianxiong Dong, Yan Jia, Aiping Li	Neural Network Based Web Log Analysis for Web Intrusion Detection
Transactions on Emerging Topics in Computing		2016	journal		?	https://ieeexplore.ieee.org/document/7389388/	Daniel Sun , Min Fu , Liming Zhu , Guoqiang Li , Qinghua Lu	Non-Intrusive Anomaly Detection With Streaming Performance Metrics and Logs for DevOps in Public Clouds: A Case Study in AWS
Journal of Information Processing		2016	journal	Information and Computing Sciences	C	https://www.scopus.com/inward/record.url?eid=2-s2.0-84961194323&partnerID=40&md5=b6ee4d3f550a1d09c239b1059d51be68	Saito, S., Maruhashi, K., Takenaka, M., Torii, S.	TOPASE: Detection and prevention of brute force attacks with disciplined IPs from IDS logs
Journal of Computer Science and Technology		2016	journal	Information and Computing Sciences	B	https://link.springer.com/article/10.1007/s11390-016-1678-7	De-Qing Zou, Hao Qin, Hai Jin	Uilog: Improving log-based fault diagnosis by log analysis
ACM Conference on Computer and Communications Security	CCS	2017	research track paper	Computer Software Distributed Computing Communications Technologies	A*	https://dl.acm.org/citation.cfm?id=3134015	Min Du, Feifei Li, Guineng Zheng, Vivek Srikumar	DeepLog: Anomaly Detection and Diagnosis from System Logs through Deep Learning	Anomaly detection is a critical step towards building a secure and trustworthy system. The primary purpose of a system log is to record system states and significant events at various critical points to help debug system failures and perform root cause analysis. Such log data is universally available in nearly all computer systems. Log data is an important and valuable resource for understanding …	We propose DeepLog, a deep neural network model utilizing Long Short-Term Memory (LSTM), to model a system log as a natural language sequence.	Anomaly detection is a critical step towards building a secure and trustworthy system. The primary purpose of a system log is to record system states and significant events at various critical points to help debug system failures and perform root cause analysis. Such log data is universally available in nearly all computer systems. Log data is an important and valuable resource for understanding …	This [model] allows DeepLog to automatically learn log patterns from normal execution, and detect anomalies when log patterns deviate from the model trained from log data under normal execution. In addition, we demonstrate how to incrementally update the DeepLog model in an online fashion so that it can adapt to new log patterns over time. Furthermore, DeepLog constructs workflows from the underl…	Extensive experimental evaluations over large log data have shown that DeepLog has outperformed other existing log-based anomaly detection methods based on traditional data mining methodologies.	Du_2017						1
Simulation Modelling Practice and Theory		2017	journal	Computation Theory and Mathematics Applied Mathematics	C	https://www.scopus.com/inward/record.url?eid=2-s2.0-85025601866&partnerID=40&md5=2dfc8f8ad9ec5a3f773153da38f3939a	Qi G., Tsai W.-T., Li W., Zhu Z., Luo Y.	A cloud-based triage log analysis and recovery framework
IEEE International Conference on High Performance Computing and Simulation	IEEE HPCS	2017	8/2		B	https://ieeexplore.ieee.org/document/8035155/	Francesco Folino , Gianluigi Folino , Luigi Pontieri , Pietro Sabatino	A Peer-to-Peer Architecture for Detecting Attacks from Network Traffic and Log Data
ACM International Conference on Knowledge Discovery and Data Mining	KDD	2017	research track paper	Data Format	A*	https://dl.acm.org/citation.cfm?id=3098124	Fei Wu, Pranay Anchuri, Zhenhui Li	Structural Event Detection from Log Messages	A wide range of modern web applications are only possible because of the composable nature of the web services they are built upon. It is, therefore, often critical to ensure proper functioning of these web services. As often, the server-side of web services is not directly accessible, several log message based analysis have been developed to monitor the status of web services. Existing technique…	We propose a novel method to mine structural events as directed workflow graphs (where nodes represent log patterns, and edges represent relations among patterns). The structural events are inclusive and correspond to interpretable episodes in the system.	A wide range of modern web applications are only possible because of the composable nature of the web services they are built upon. It is, therefore, often critical to ensure proper functioning of these web services. As often, the server-side of web services is not directly accessible, several log message based analysis have been developed to monitor the status of web services. Existing technique…	Our solution is based on the observation that meaningful log patterns and relations often form workflow structures that are connected. Our method directly models the overall quality of structural events.	Through both qualitative and quantitative experiments on real world datasets, we demonstrate the effectiveness and the expressiveness of our event detection method.	Wu_2017											1
ACM International Conference on Knowledge Discovery and Data Mining	KDD	2017	research track paper	Data Format	A*	https://dl.acm.org/citation.cfm?id=3098022	Tao Li, Yexi Jiang, Chunqiu Zeng, Bin Xia, Zheng Liu, Wubai Zhou, Xiaolong Zhu, Wentao Wang, Liang Zhang, Jun Wu, Li Xue, Dewei Bao	FLAP: An End-to-End Event Log Analysis Platform for System Management	Many systems, such as distributed operating systems, complex networks, and high throughput web-based applications, are continuously generating large volume of event logs. These logs contain useful information to help system administrators to understand the system running status and to pinpoint the system failures. Generally, due to the scale and complexity of modern systems, the generated logs ar…	In this paper, we design and implement an integrated system, called FIU Log Analysis Platform (a.k.a. FLAP), that aims to facilitate the data analytics for system event logs.	Many systems, such as distributed operating systems, complex networks, and high throughput web-based applications, are continuously generating large volume of event logs. These logs contain useful information to help system administrators to understand the system running status and to pinpoint the system failures. Generally, due to the scale and complexity of modern systems, the generated logs ar…	FLAP provides an end-to-end solution that utilizes advanced data mining techniques to assist log analysts to conveniently, timely, and accurately conduct event log knowledge discovery, system status investigation, and system failure diagnosis. Specifically, in FLAP, state-of-the-art template learning techniques are used to extract useful information from unstructured raw logs; advanced data trans…	Since 2016, FLAP has been used by Huawei Technologies Co. Ltd for internal event log analysis, and has provided effective support in its system operation and workflow optimization.	Li_2017													1
IEEE Global Telecommunications Conference	GLOBECOM	2017	research track paper		B	https://www.scopus.com/inward/record.url?eid=2-s2.0-85046449321&partnerID=40&md5=e3757b75e190a28d5f4fb8d33daba481	Yoshida N., Ata S., Nakayama H., Hayashi T.	Automation of Network Operations by Cooperation between Anomaly Detections and Operation Logs
Empirical Software Engineering		2017	journal	Computer Software	A	https://www.scopus.com/inward/record.url?eid=2-s2.0-84966320690&partnerID=40&md5=ba592649195bc874879eec14897f38cf	Chen, B., (Jack) Jiang, Z.M.	Characterizing logging practices in Java-based open source software projects – a replication study in Apache Software Foundation	Log messages, which are generated by the debug statements that developers insert into the code at runtime, contain rich information about the runtime behavior of software systems. Log messages are used widely for system monitoring, problem diagnoses and legal compliances. Yuan et al. performed the first empirical study on the logging practices in open source software systems. They studied the dev…	In this paper, we have performed a replication study in order to assess whether their findings would be applicable to Java projects in Apache Software Foundations.	Log messages, which are generated by the debug statements that developers insert into the code at runtime, contain rich information about the runtime behavior of software systems. Log messages are used widely for system monitoring, problem diagnoses and legal compliances. Yuan et al. performed the first empirical study on the logging practices in open source software systems. They studied the dev…	We examined 21 different Java-based open source projects from three different categories: server-side, client-side and supporting-component.	Similar to the original study, our results show that all projects contain logging code, which is actively maintained. However, contrary to the original study, bug reports containing log messages take a longer time to resolve than bug reports without log messages. A significantly higher portion of log updates are for enhancing the quality of logs (e.g., formatting & style changes and spelling/gram…	Chen_2017a			1
Empirical Software Engineering		2017	journal	Computer Software	A	https://www.scopus.com/inward/record.url?eid=2-s2.0-84991112488&partnerID=40&md5=d04d6a1d7186bb0d50692743772878a6	Li, H., Shang, W., Hassan, A.E.	Which log level should developers choose for a new logging statement?	Logging statements are used to record valuable runtime information about applications. Each logging statement is assigned a log level such that users can disable some verbose log messages while allowing the printing of other important ones. However, prior research finds that developers often have difficulties when determining the appropriate level for their logging statements. In this paper, we p…	In this paper, we propose an approach to help developers determine the appropriate log level when they add a new logging statement.	Logging statements are used to record valuable runtime information about applications. Each logging statement is assigned a log level such that users can disable some verbose log messages while allowing the printing of other important ones. However, prior research finds that developers often have difficulties when determining the appropriate level for their logging statements.	We analyze the development history of four open source projects (Hadoop, Directory Server, Hama, and Qpid), and leverage ordinal regression models to automatically suggest the most appropriate level for each newly-added logging statement.	First, we find that our ordinal regression model can accurately suggest the levels of logging statements with an AUC (area under the curve; the higher the better) of 0.75 to 0.81 and a Brier score (the lower the better) of 0.44 to 0.66, which is better than randomly guessing the appropriate log level (with an AUC of 0.50 and a Brier score of 0.80 to 0.83) or naively guessing the log level based o…	Li_2017a			1
IBM Journal of Research and Development		2017	journal	Computer Software Information Systems	A	https://www.scopus.com/inward/record.url?eid=2-s2.0-85016441785&partnerID=40&md5=3c6dc05775f6b95112a50ef728681b5b	Ramakrishna, V., Rajput, N., Mukherjea, S., Dey, K.	A platform for end-to-end mobile application infrastructure analytics using system log correlation	Monitoring and analyzing the performance of mobile applications is challenging when the applications rely on remote services and functioning networks. Root causes of failures and performance anomalies of client-server applications are difficult to pinpoint because of their distributed nature. In this paper, we introduce the Mobile Infrastructure Analytics System (MIAS), which helps efficiently de…	In this paper, we introduce the Mobile Infrastructure Analytics System (MIAS), which helps efficiently detect and debug application faults in a distributed environment, holistically analyzing application and network activity across client devices, application servers, database servers, etc.	Monitoring and analyzing the performance of mobile applications is challenging when the applications rely on remote services and functioning networks. Root causes of failures and performance anomalies of client-server applications are difficult to pinpoint because of their distributed nature.	MIAS collects hypertext transfer protocol (HTTP) session data and system logs from servers and instrumented mobile applications, automatically correlates HTTP sessions with server activity, detects anomalous behavior using statistical techniques, and extracts a small and relevant set of log entries for manual inspection.	We show how faults were detected and root causes pinpointed just by glancing at the evidence, for a real-world bookstore mobile application.	Ramakrishna_2017												1
IBM Journal of Research and Development		2017	journal	Computer Software Information Systems	A	https://www.scopus.com/inward/record.url?eid=2-s2.0-85016417253&partnerID=40&md5=dfe1e7c902b4859e00a5892f46790f81	Wang, J., Li, C., Han, S., Sarkar, S., Zhou, X.	Predictive maintenance based on event-log analysis: A case study	Predictive maintenance techniques are designed to help anticipate equipment failures to allow for advance scheduling of corrective maintenance, thereby preventing unexpected equipment downtime, improving service quality for customers, and also reducing the additional cost caused by over-maintenance in preventative maintenance policies. Many types of equipment - e.g., automated teller machines (AT…	Aiming at these types of equipment, we present a general classification-based failure prediction method.	Predictive maintenance techniques are designed to help anticipate equipment failures to allow for advance scheduling of corrective maintenance, thereby preventing unexpected equipment downtime, improving service quality for customers, and also reducing the additional cost caused by over-maintenance in preventative maintenance policies. Many types of equipment - e.g., automated teller machines (AT…	In our parameterized model, we systematically defined four categories of features to try to cover all possibly useful features, and then used feature selection to identify the most important features for model construction. We chose ATMs as the example equipment and used real ATM run-time event logs and maintenance records as experimental data to evaluate our method on the feasibility and effecti…	The general solution is sufficiently flexible and complex to address failure prediction for target equipment types.	Wang_2017									1
International Symposium on Parallel and Distributed Processing Workshops and Phd Forum		2011	workshop		?	https://ieeexplore.ieee.org/document/6009015/	Nithin Nakka , Ankit Agrawal , Alok Choudhary	Predicting Node Failure in High Performance Computing Systems from Failure and Usage Logs
IEEE International Conference on Cluster Computing	CLUSTER	2017	research track paper	Distributed Computing	A	https://ieeexplore.ieee.org/document/8049013/	Byung H. Park , Saurabh Hukerikar , Ryan Adamson , Christian Engelmann	Big Data Meets HPC Log Analytics: Scalable Approach to Understanding Systems at Extreme Scale	Today's high-performance computing (HPC) systems are heavily instrumented, generating logs containing information about abnormal events, such as critical conditions, faults, errors and failures, system resource utilization, and about the resource usage of user applications. These logs, once fully analyzed and correlated, can produce detailed information about the system health, root causes of fai…	This paper introduces a HPC log data analytics framework that is based on a distributed NoSQL database technology, which provides scalability and high availability, and the Apache Spark framework for rapid in-memory processing of the log data.	Today's high-performance computing (HPC) systems are heavily instrumented, generating logs containing information about abnormal events, such as critical conditions, faults, errors and failures, system resource utilization, and about the resource usage of user applications. These logs, once fully analyzed and correlated, can produce detailed information about the system health, root causes of fai…	The analytics framework enables the extraction of a range of information about the system so that system administrators and end users alike can obtain necessary insights for their specific needs. We describe our experience with using this framework to glean insights from the log data about system behavior from the Titan supercomputer at the Oak Ridge National Laboratory.		Park_2017												1
European Conference on Pattern Languages of Programs	EuroPLop	2017	research track paper	Computer Software	B	https://dl.acm.org/citation.cfm?id=3147720	Tiago Boldt Sousa, Hugo Sereno Ferreira, Filipe Figueiredo Correia, Ademar Aguiar	Engineering Software for the Cloud: Messaging Systems and Logging
IEEE International Conference on Web Services	ICWS	2017	industry track paper	Information Systems	A	https://ieeexplore.ieee.org/document/8029786/	Siyang Lu , BingBing Rao , Xiang Wei , Byungchul Tak , Long Wang , Liqiang Wang	Log-based Abnormal Task Detection and Root Cause Analysis for Spark	Application delays caused by abnormal tasks arecommon problems in big data computing frameworks. Anabnormal task in Spark, which may run slowly withouterror or warning logs, not only reduces its resident node'sperformance, but also affects other nodes' efficiency.Spark log files report neither root causes of abnormal tasks,nor where and when abnormal scenarios happen. AlthoughSpark provides a “sp…	This paper proposes an approach to detect abnormality andanalyzes root causes using Spark log files.	Application delays caused by abnormal tasks arecommon problems in big data computing frameworks. Anabnormal task in Spark, which may run slowly withouterror or warning logs, not only reduces its resident node'sperformance, but also affects other nodes' efficiency.Spark log files report neither root causes of abnormal tasks,nor where and when abnormal scenarios happen. AlthoughSpark provides a “sp…	Unlike commononline monitoring or analysis tools, our approach is a pureoff-line method that can analyze abnormality accurately. Ourapproach consists of four steps. First, a parser preprocessesraw log files to generate structured log data. Second, ineach stage of Spark application, we choose features relatedto execution time and data locality of each task, as well asmemory usage and garbage colle…	Our experimental results show that the proposedapproach is accurate on detecting abnormal tasks as well asfinding the root causes	Lu_2017						1
IEEE International Symposium on Cluster, Cloud and Grid Computing	CCGrid	2017	research track paper	Distributed Computing	A	https://dl.acm.org/citation.cfm?id=3101172	Sheng Di, Rinku Gupta, Marc Snir, Eric Pershey, Franck Cappello	LogAider: A tool for mining potential correlations of HPC log events	Today's large-scale supercomputers are producing a huge amount of log data. Exploring various potential correlations of fatal events is crucial for understanding their causality and improving the working efficiency for system administrators. To this end, we developed a toolkit, named LogAider, that can reveal three types of potential correlations: across-field, spatial, and temporal. Across-field…	To this end, we developed a toolkit, named LogAider, that can reveal three types of potential correlations: across-field, spatial, and temporal.	Today's large-scale supercomputers are producing a huge amount of log data. Exploring various potential correlations of fatal events is crucial for understanding their causality and improving the working efficiency for system administrators.	Across-field correlation refers to the statistical correlation across fields within a log or across multiple logs based on probabilistic analysis. For analyzing the spatial correlation of events, we developed a generic, easy-to-use visualizer that can view any events queried by users on a system machine graph. LogAider can also mine spatial correlations by an optimized K-meaning clustering algori…	We find that LogAider very helpful for revealing the potential correlations of fatal system events and job events, with an accurate mining of across-field correlation with both precision and recall of 99.9-100%, as well as precise detection of temporal-correlation with a high similarity (up to 95%) to the ground-truth.	Di_2017													1
International Journal of Computer Applications	IJCA	2014	journal		?	https://www.researchgate.net/profile/Sumitra_Pundlik/publication/261700670_Real_Time_Generalized_Log_File_Management_and_Analysis_using_Pattern_Matching_and_Dynamic_Clustering/links/0deec5350cce89cacb000000/Real-Time-Generalized-Log-File-Management-and-Analysis-using-Pattern-Matching-and-Dynamic-Clustering.pdf	Bhupendra Moharil, Chaitanya Gokhale, Vijayendra Ghadge, Pranav Tambvekar, Sumitra Pundlik, Gaurav Rai	Real time generalized log file management and analysis using pattern matching and dynamic clustering
Large Installation System Administration Conference	LISA	2004			?	https://www.usenix.org/legacy/event/lisa04/tech/full_papers/rouillard/rouillard.pdf	John P. Rouillard	Real-time Log File Analysis Using the Simple Event Correlator (SEC).
Workshop on Machine Learning for Computing Systems		2018			?	https://dl.acm.org/citation.cfm?id=3217872	Andy Brown, Aaron Tuor, Brian Hutchinson, Nicole Nichols	Recurrent Neural Network Attention Mechanisms for Interpretable System Log Anomaly Detection
Digital Investigation		2017	journal	Other Information and Computing Sciences	C	https://www.scopus.com/inward/record.url?eid=2-s2.0-85019097613&partnerID=40&md5=a8adb9d5911ad2c7b951fe8e505c337a	Studiawan, H., Payne, C., Sohel, F.	Graph clustering and anomaly detection of access control log for forensic purposes
International Conference on Big Data Analysis		2016	7/2		?	https://ieeexplore.ieee.org/document/7509792/	Maocai Cheng , Kaiyong Xu , Xuerong Gong	Research on audit log association rule mining based on improved Apriori algorithm
International Conference on Database and Expert Systems Applications	DEXA	2017	research track paper	Artificial Intelligence and Image Processing Data Format Information Systems	B	http://link.springer.com/chapter/10.1007/978-3-319-64471-4_22	Hamza Labbaci, Brahim Medjahed, Youcef Aklouf	Learning Interactions from Web Service Logs
Computational Collective Intelligence. Technologies and Applications		2014	10/1		?	http://link.springer.com/chapter/10.1007/978-3-319-11289-3_67	Grzegorz Kołaczek, Tomasz Kuzemko	Security Incident Detection Using Multidimensional Analysis of the Web Server Log Files
International Conference for High Performance Computing, Networking, Storage and Analysis, SC		2017	14/1		?	https://www.scopus.com/inward/record.url?eid=2-s2.0-85017235475&partnerID=40&md5=72ccc74bc6eb284e5458c7bffb71881b	Liu, Y., Gunasekaran, R., Ma, X., Vazhkudai, S.S.	Server-Side Log Data Analytics for I/O Workload Characterization and Coordination on Large Shared Storage Systems
Asia Conference on Computer and Communications Security		2017	research track paper		?	https://www.scopus.com/inward/record.url?eid=2-s2.0-85021926604&partnerID=40&md5=182a8eaacc2615c7958820b1d50330f1	Karande, V., Bauman, E., Lin, Z., Khan, L.	SGX-Log: Securing system logs with SGX
Journal of Supercomputing		2017	journal	Distributed Computing	B	https://www.scopus.com/inward/record.url?eid=2-s2.0-85014539558&partnerID=40&md5=c83bed2fb0aaf4af77fabfba35af2a41	Vega C., Roquero P., Leira R., Gonzalez I., Aracil J.	Loginson: a transform and load system for very large-scale log analysis in large IT infrastructures
International Conference on Circuit ,Power and Computing Technologies		2017	8/2		?	https://ieeexplore.ieee.org/document/8074209/	Ezz El-Din Hemdan , D. H. Manjaiah	Spark-based log data analysis for reconstruction of cybercrime events in cloud environment
International Joint Conference on e-Business and Telecommunications	ICETE	2017	research track paper		C	https://www.scopus.com/inward/record.url?eid=2-s2.0-85029453283&partnerID=40&md5=7ee7245833126969ecc8404e7d0af2be	Tillem, G., Erkin, Z., Lagendijk, R.L.	Mining encrypted software logs using alpha algorithm
Journal of Systems Architecture		2017	journal	Computer Software	B	https://www.scopus.com/inward/record.url?eid=2-s2.0-85032346005&partnerID=40&md5=8244a21301fbcc51fbbf0c72bbb8228c	Li B., Lin Y., Zhang S.	Multi-Task Learning for Intrusion Detection on web logs
International Conference on Software Engineering	ICSE	2016	industry track paper	Computer Software	A*	https://dl.acm.org/citation.cfm?id=2889232	Qingwei Lin, Hongyu Zhang, Jian-Guang Lou, Yu Zhang, Xuewei Chen	Log clustering based problem identification for online service systems	Logs play an important role in the maintenance of large-scale online service systems. When an online service fails, engineers need to examine recorded logs to gain insights into the failure and identify the potential problems. Traditionally, engineers perform simple keyword search (such as "error" and "exception") of logs that may be associated with the failures. Such an approach is often time co…	Through our collaboration with Microsoft service product teams, we propose LogCluster, an approach that clusters the logs to ease log-based problem identification.	Logs play an important role in the maintenance of large-scale online service systems. When an online service fails, engineers need to examine recorded logs to gain insights into the failure and identify the potential problems. Traditionally, engineers perform simple keyword search (such as "error" and "exception") of logs that may be associated with the failures. Such an approach is often time co…	LogCluster also utilizes a knowledge base to check if the log sequences occurred before. Engineers only need to examine a small number of previously unseen, representative log sequences extracted from the clusters to identify a problem, thus significantly reducing the number of logs that should be examined, meanwhile improving the identification accuracy.	Through experiments on two Hadoop-based applications and two large-scale Microsoft online service systems, we show that our approach is effective and outperforms the state-of-the-art work proposed by Shang et al. in ICSE 2013. We have successfully applied LogCluster to the maintenance of many actual Microsoft online service systems. In this paper, we also share our success stories and lessons lea…	Lin_2016				1
International Symposium on Software Reliability Engineering	ISSRE	2017	industry track paper	Computer Software	A	https://ieeexplore.ieee.org/document/8109100/	Christophe Bertero , Matthieu Roy , Carla Sauvanaud , Gilles Tredan	Experience Report: Log Mining Using Natural Language Processing and Application to Anomaly Detection	Event logging is a key source of information on a system state. Reading logs provides insights on its activity, assess its correct state and allows to diagnose problems. However, reading does not scale: with the number of machines increasingly rising, and the complexification of systems, the task of auditing systems' health based on logfiles is becoming overwhelming for system administrators. Thi…	In this work, we target minimal human intervention for logfile processing and propose a new approach that considers logs as regular text (as opposed to related works that seek to exploit at best the little structure imposed by log formatting).	Event logging is a key source of information on a system state. Reading logs provides insights on its activity, assess its correct state and allows to diagnose problems. However, reading does not scale: with the number of machines increasingly rising, and the complexification of systems, the task of auditing systems' health based on logfiles is becoming overwhelming for system administrators. Thi…	This approach allows to leverage modern techniques from natural language processing. More specifically, we first apply a word embedding technique based on Google's word2vec algorithm: logfiles' words are mapped to a high dimensional metric space, that we then exploit as a feature space using standard classifiers. The resulting pipeline is very generic, computationally efficient, and requires very…	Results show a strong predictive performance (≈ 90% accuracy) using three out-of-the-box classifiers.	Bertero_2017						1
Journal of Systems and Software	JSS	2017	journal	Computer Software Information Systems	A	https://www.scopus.com/inward/record.url?eid=2-s2.0-85001086191&partnerID=40&md5=43f3205e098dd7e1e2dbb26d618bf80d	Mavridis I., Karatza H.	Performance evaluation of cloud-based log file analysis with Apache Hadoop and Apache Spark	Log files are generated in many different formats by a plethora of devices and software. The proper analysis of these files can lead to useful information about various aspects of each system. Cloud computing appears to be suitable for this type of analysis, as it is capable to manage the high production rate, the large size and the diversity of log files. In this paper we investigated log file a…	In this paper we investigated log file analysis with the cloud computational frameworks Apache™Hadoop® and Apache Spark™.	Log files are generated in many different formats by a plethora of devices and software. The proper analysis of these files can lead to useful information about various aspects of each system. Cloud computing appears to be suitable for this type of analysis, as it is capable to manage the high production rate, the large size and the diversity of log files.	We developed realistic log file analysis applications in both frameworks and we performed SQL-type queries in real Apache Web Server log files. Various experiments were performed with different parameters in order to study and compare the performance of the two frameworks.		Mavridis_2017					1
Journal of Internet Technology		2017			C	https://www.scopus.com/inward/record.url?eid=2-s2.0-85028454909&partnerID=40&md5=09c69b3716bca3b38b8cf84ff2085ab3	Zou, J., Tao, D., Yu, J.	A hybrid intrusion detection model for web log-based attacks
International Conference on Information and Communications Security	ICICS	2018	research track paper	Computer Software	B	http://link.springer.com/chapter/10.1007/978-3-030-01950-1_42	Mamoru Mimura, Hidema Tanaka	A Linguistic Approach Towards Intrusion Detection in Actual Proxy Logs
ACM International Symposium on High Performance Distributed Computing	HPDC	2018	research track paper	Distributed Computing	A	https://dl.acm.org/citation.cfm?id=3208044	Aidi Pi, Wei Chen, Xiaobo Zhou, Mike Ji	Profiling distributed systems in lightweight virtualized environments with logs and resource metrics	Understanding and troubleshooting distributed systems in the cloud is considered a very difficult problem because the execution of a single user request is distributed to multiple machines. Further, the multi-tenancy nature of cloud environments further introduces interference that causes performance issues. Most existing troubleshooting tools either focus on log analysis or intrusive tracing met…	We propose and implement LRTrace, a non-intrusive tracing and feedback control tool for distributed applications in lightweight virtualized environments.	Understanding and troubleshooting distributed systems in the cloud is considered a very difficult problem because the execution of a single user request is distributed to multiple machines. Further, the multi-tenancy nature of cloud environments further introduces interference that causes performance issues. Most existing troubleshooting tools either focus on log analysis or intrusive tracing met…	LRTrace profiles both log messages and actual resource consumptions of an application at runtime in a fine-grained manner, which is made possible by lightweight container-based virtualization. By correlating these two kinds of information, LRTrace provides users the ability to build the relationship between changes in resource consumption and application events. Furthermore, LRTrace allows users …	In system evaluation, we run Spark and MapReduce applications in a multi-tenant cluster and show that LRTrace can diagnose performance issues caused by either interference or bugs, or both. It also helps users to understand the workflows of data-parallel applications.	Pi_2018								1
Computers in Industry		2018	journal	Computer Software Distributed Computing Cognitive Science	B	https://www.scopus.com/inward/record.url?eid=2-s2.0-85041421248&partnerID=40&md5=fc6cbcdadd25e865b64adb900b73b71b	Nagashree N., Tejasvi R., Swathi K.C.	An Early Risk Detection and Management System for the Cloud with Log Parser
IEEE International Conference on Program Comprehension	ICPC	2018	research track paper	Computer Software	C	https://dl.acm.org/citation.cfm?id=3196345	Diego Castro, Marcelo Schots	Analysis of test log information through interactive visualizations
Neurocomputing		2018	journal	Artificial Intelligence and Image Processing Cognitive Science Biomedical Engineering	B	https://www.scopus.com/inward/record.url?eid=2-s2.0-85042663069&partnerID=40&md5=adaf75b346004ad640b2ffcb1c1ca51e	Tonnelier E., Baskiotis N., Guigue V., Gallinari P.	Anomaly detection in smart card logs and distant evaluation with Twitter: a robust framework
International Symposium on Parallel and Distributed Computing	ISPDC	2018	research track paper	Distributed Computing	C	https://ieeexplore.ieee.org/document/8452034/	Siavash Ghiasvand , Florina M. Ciorba	Assessing Data Usefulness for Failure Analysis in Anonymized System Logs
Conference on Communications and Network Security		2017	9/2		?	https://www.scopus.com/inward/record.url?eid=2-s2.0-85016029704&partnerID=40&md5=b6f0cbe57b7a1d78e939b5a7f6b07903	Suh-Lee, C., Jo, J.-Y., Kim, Y.	Text mining for security threat detection discovering hidden information in unstructured log messages
International Conference on Database and Expert Systems Applications	DEXA	2018	research track paper	Artificial Intelligence and Image Processing Data Format Information Systems	B	http://link.springer.com/chapter/10.1007/978-3-319-98812-2_12	Marietheres Dietz, Günther Pernul	Big Log Data Stream Processing: Adapting an Anomaly Detection Technique
Empirical Software Engineering		2018	journal	Computer Software	A	http://link.springer.com/article/10.1007/s10664-018-9603-z	Mehran Hassani, Weiyi Shang, Emad Shihab, Nikolaos Tsantalis	Studying and detecting log-related issues	Logs capture valuable information throughout the execution of software systems. The rich knowledge conveyed in logs is highly leveraged by researchers and practitioners in performing various tasks, both in software development and its operation. Log-related issues, such as missing or having outdated information, may have a large impact on the users who depend on these logs. In this paper, we firs…	characterization of log-related issues + automated tool to detect log-related issues	Logs capture valuable information throughout the execution of software systems. The rich knowledge conveyed in logs is highly leveraged by researchers and practitioners in performing various tasks, both in software development and its operation. Log-related issues, such as missing or having outdated information, may have a large impact on the users who depend on these logs.	In this paper, we first perform an empirical study on log-related issues in two large-scale, open source software systems. We conducted a manual study and identified seven root-causes of the log-related issues.	We find that the files with log-related issues have undergone statistically significantly more frequent prior changes, and bug fixes. We also find that developers fixing these log-related issues are often not the ones who introduced the logging statement nor the owner of the method containing the logging statement. Maintaining logs is more challenging without clear experts. Finally, we find that …	Hassani_2018			1
International Conference on Data Mining Workshops		2012	workshop paper		?	https://ieeexplore.ieee.org/document/6406404/	Wilhelmiina Hämäläinen	Thorough Analysis of Log Data with Dependency Rules: Practical Solutions and Theoretical Challenges
Empirical Software Engineering		2018	journal	Computer Software	A	https://www.scopus.com/inward/record.url?eid=2-s2.0-85041236951&partnerID=40&md5=4f3d82a1856c65710f10c619e2becb5a	Li H., Chen T.-H.P., Shang W., Hassan A.E.	Studying software logging using topic models	Software developers insert logging statements in their source code to record important runtime information; such logged information is valuable for understanding system usage in production and debugging system failures. However, providing proper logging statements remains a manual and challenging task. Missing an important logging statement may increase the difficulty of debugging a system failur…	We studied the relationship between the topics of a code snippet and the likelihood of a code snippet being logged (i.e., to contain a logging statement).	Software developers insert logging statements in their source code to record important runtime information; such logged information is valuable for understanding system usage in production and debugging system failures. However, providing proper logging statements remains a manual and challenging task. Missing an important logging statement may increase the difficulty of debugging a system failur…	In this paper, we used automatically-computed topics of a code snippet to approximate the functionality of a code snippet. (...) Our driving intuition is that certain topics in the source code are more likely to be logged than others.	we found that i) there exists a small number of “log-intensive” topics that are more likely to be logged than other topics; ii) each pair of the studied systems share 12% to 62% common topics, and the likelihood of logging such common topics has a statistically significant correlation of 0.35 to 0.62 among all the studied systems; and iii) our topic-based metrics help explain the likelihood of a …	Li_2018			1
International Conference on Availability, Reliability and Security	ARES	2018	research track paper	Computer Software	B	https://dl.acm.org/citation.cfm?id=3230855	Zongze Li, Matthew Davidson, Song Fu, Sean Blanchard, Michael Lang	Converting Unstructured System Logs into Structured Event List for Anomaly Detection
International Conference on Agents and Artificial Intelligence	ICAART	2018	research track paper	Artificial Intelligence and Image Processing	C	https://www.scopus.com/inward/record.url?eid=2-s2.0-85046626347&partnerID=40&md5=8247f312461a5e9eda8b103175cef9c0	Dagnely P., Tsiporkova E., Tourwe T.	Data-driven relevancy estimation for event logs exploration and preprocessing
International Parallel and Distributed Processing Symposium Workshop		2015	WORKSHOP		?	https://ieeexplore.ieee.org/document/7284426/	Nentawe Gurumdimma , Arshad Jhumka , Maria Liakata , Edward Chuah , James Browne	Towards Detecting Patterns in Failure Logs of Large-Scale Distributed Systems
IEEE International Conference on Computer Communications	IEEE INFOCOM	2018	research track paper	Distributed Computing	A*	https://ieeexplore.ieee.org/document/8486257/	Subhendu Khatuya , Niloy Ganguly , Jayanta Basak , Madhumita Bharde , Bivas Mitra	ADELE: Anomaly Detection from Event Log Empiricism	A large population of users gets affected by sudden slowdown or shutdown of an enterprise application. System administrators and analysts spend considerable amount of time dealing with functional and performance bugs. These problems are particularly hard to detect and diagnose in most computer systems, since there is a huge amount of system generated supportability data (counters, logs etc.) that…	In this paper, we present ADELE, an empirical, data-driven methodology for early detection of anomalies in data storage systems.	A large population of users gets affected by sudden slowdown or shutdown of an enterprise application. System administrators and analysts spend considerable amount of time dealing with functional and performance bugs. These problems are particularly hard to detect and diagnose in most computer systems, since there is a huge amount of system generated supportability data (counters, logs etc.) that…	The key feature of our solution is diligent selection of features from system logs and development of effective machine learning techniques for anomaly prediction. ADELE learns from system's own history to establish the baseline of normal behavior and gives accurate indications of the time period when something is amiss for a system. We also establish the existence of problem “signatures” which h…	Validation on more than 4800 actual support cases shows ~ 83% true positive rate and ~ 12% false positive rate in identifying periods when the machine is not performing normally. ADELE's capability to predict early paves way for online failure prediction for customer systems.	Khatuya_2018									1
International Conference on Computer Science and Software Engineering		2012	6/2		?	https://ieeexplore.ieee.org/document/6261962/	Dileepa Jayathilake	Towards structured log analysis
Task Models and Diagrams for Users Interface Design		2007			?	http://link.springer.com/chapter/10.1007/978-3-540-70816-2_3	Ivo Malý, Pavel Slavík	Towards Visual Analysis of Usability Test Logs Using Task Models
Computers and Security		2018	journal	Computer Software Distributed Computing Information Systems	B	https://www.scopus.com/inward/record.url?eid=2-s2.0-85053399855&partnerID=40&md5=bc9fd672f5878bc394a6c8cb68cfd3b3	Landauer M., Wurzenberger M., Skopik F., Settanni G., Filzmoser P.	Dynamic log file analysis: An unsupervised cluster evolution approach for anomaly detection
IEICE Transactions on Fundamentals of Electronics Communications and Computer Sciences		2018	journal	Computer Software Electrical and Electronic Engineering	C	https://www.scopus.com/inward/record.url?eid=2-s2.0-85053827869&partnerID=40&md5=6ae437b1b8787439a388d07be8dac0cc	Sato T., Himura Y., Yasuda Y.	Evidence-based context-aware log data management for integrated monitoring system
IEEE Transactions on Dependable and Secure Computing		2018	journal	Computer Software Data Format Distributed Computing	A	https://ieeexplore.ieee.org/document/8067504/	Pinjia He , Jieming Zhu , Shilin He , Jian Li , Michael R. Lyu	Towards Automated Log Parsing for Large-Scale Log Data Analysis	Logs are widely used in system management for dependability assurance because they are often the only data available that record detailed system runtime behaviors in production. Because the size of logs is constantly increasing, developers (and operators) intend to automate their analysis by applying data mining methods, therefore structured input data (e.g., matrices) are required. This triggers…	In this paper, we first present a characterization study of the current state of the art log parsers and evaluate their efficacy on five real-world datasets with over ten million log messages. we design and implement a parallel log parser (namely POP) on top of Spark, a large-scale data processing platform.	Logs are widely used in system management for dependability assurance because they are often the only data available that record detailed system runtime behaviors in production. Because the size of logs is constantly increasing, developers (and operators) intend to automate their analysis by applying data mining methods, therefore structured input data (e.g., matrices) are required. This triggers…	Comprehensive experiments have been conducted to evaluate POP on both synthetic and real-world datasets.	We determine that, although the overall accuracy of these parsers is high, they are not robust across all datasets. When logs grow to a large scale (e.g., 200 million log messages), which is common in practice, these parsers are not efficient enough to handle such data on a single computer. The evaluation results demonstrate the capability of POP in terms of accuracy, efficiency, and effectivenes…	He_2018				1
Passive and Active Measurement	PAM	2018	research track paper	Information Systems	B	http://link.springer.com/chapter/10.1007/978-3-319-76481-8_13	Oliver Gasser, Benjamin Hof, Max Helm, Maciej Korczynski, Ralph Holz, Georg Carle	In Log We Trust: Revealing Poor Security Practices with Certificate Transparency Logs and Internet Measurements
International Conference on Software Engineering	ICSE	2017	research track paper	Computer Software	A*	https://dl.acm.org/citation.cfm?id=3097378	Boyuan Chen, Zhen Ming (Jack) Jiang	Characterizing and detecting anti-patterns in the logging code	Snippets of logging code are output statements (e.g., LOG.info or System.out.println) that developers insert into a software system. Although more logging code can provide more execution context of the system's behavior during runtime, it is undesirable to instrument the system with too much logging code due to maintenance overhead. Furthermore, excessive logging may cause unexpected side-effects…	In this paper, we study the problem of how-to-log by characterizing and detecting the anti-patterns in the logging code.	Snippets of logging code are output statements (e.g., LOG.info or System.out.println) that developers insert into a software system. Although more logging code can provide more execution context of the system's behavior during runtime, it is undesirable to instrument the system with too much logging code due to maintenance overhead. Furthermore, excessive logging may cause unexpected side-effects…	As the majority of the logging code is evolved together with the feature code, the remaining set of logging code changes usually contains the fixes to the anti-patterns. We have manually examined 352 pairs of independently changed logging code snippets from three well-maintenance open source systems: ActiveMQ, Hadoop and Maven.	Our analysis has resulted in six different anti-patterns in the logging code. To demonstrate the value of our findings, we have encoded these anti-patterns into a static code analysis tool, LCAnalyzer. Case studies show that LCAnalyzer has an average recall of 95% and precision of 60% and can be used to automatically detect previously unknown anti-patterns in the source code. To gather feedback, …	Chen_2017	1
Cluster Computing		2017	journal		?	http://link.springer.com/article/10.1007/s10586-017-1317-2	Boyeon Song, Jangwon Choi, Sang-Soo Choi, Jungsuk Song	Visualization of security event logs across multiple networks and its application to a CSOC
IEEE International Conference on Program Comprehension	ICPC	2018	research track paper	Computer Software	C	https://dl.acm.org/citation.cfm?id=3196328	Shanshan Li, Xu Niu, Zhouyang Jia, Ji Wang, Haochen He, Teng Wang	Logtracker: learning log revision behaviors proactively from software evolution history
Security and Communication Networks		2015	journal		Unranked	https://www.scopus.com/inward/record.url?eid=2-s2.0-84931010064&partnerID=40&md5=3792d59ea5012419a91fb5ad78d261a1	Alsaleh, M., Alarifi, A., Alqahtani, A., Al-Salman, A.	Visualizing web server attacks: Patterns in PHPIDS logs
International Conference on Automated Software Engineering	ASE	2018	research track paper	Computer Software	A	https://dl.acm.org/citation.cfm?id=3238214	Boyuan Chen, Jian Song, Peng Xu, Xing Hu, Zhen Ming (Jack) Jiang	An automated approach to estimating code coverage measures via execution logs	Software testing is a widely used technique to ensure the quality of software systems. Code coverage measures are commonly used to evaluate and improve the existing test suites. Based on our industrial and open source studies, existing state-of-the-art code coverage tools are only used during unit and integration testing due to issues like engineering challenges, performance overhead, and incompl…	To resolve these issues, in this paper we have proposed an automated approach, called LogCoCo, to estimating code coverage measures using the readily available execution logs.	Software testing is a widely used technique to ensure the quality of software systems. Code coverage measures are commonly used to evaluate and improve the existing test suites. Based on our industrial and open source studies, existing state-of-the-art code coverage tools are only used during unit and integration testing due to issues like engineering challenges, performance overhead, and incompl…	Using program analysis techniques, LogCoCo matches the execution logs with their corresponding code paths and estimates three different code coverage criteria: method coverage, statement coverage, and branch coverage.	Case studies on one open source system (HBase) and five commercial systems from Baidu and systems show that: (1) the results of LogCoCo are highly accurate (>96% in seven out of nine experiments) under a variety of testing activities (unit testing, integration testing, and benchmarking); and (2) the results of LogCoCo can be used to evaluate and improve the existing test suites. Our collaborators…	Chen_2018										1
International Conference on Automated Software Engineering	ASE	2018	research track paper	Computer Software	A	https://dl.acm.org/citation.cfm?id=3238193	Pinjia He, Zhuangbin Chen, Shilin He, Michael R. Lyu	Characterizing the natural language descriptions in software logging statements	Logging is a common programming practice of great importance in modern software development, because software logs have been widely used in various software maintenance tasks. To provide high-quality logs, developers need to design the description text in logging statements carefully. Inappropriate descriptions will slow down or even mislead the maintenance process, such as postmortem analysis. H…	To fill this significant gap, in this paper, we systematically study what developers log, with focus on the usage of natural language descriptions in logging statements.	Logging is a common programming practice of great importance in modern software development, because software logs have been widely used in various software maintenance tasks. To provide high-quality logs, developers need to design the description text in logging statements carefully. Inappropriate descriptions will slow down or even mislead the maintenance process, such as postmortem analysis. H…	We obtain 6 valuable findings by conducting source code analysis on 10 Java projects and 7 C# projects, which contain 28,532,975 LOC and 115,159 logging statements in total.	Furthermore, our study demonstrates the potential of automated description text generation for logging statements by obtaining up to 49.04 BLEU-4 score and 62.1 ROUGE-L score using a simple information retrieval method. To facilitate future research in this field, the datasets have been publicly released.	He_2018a			1
International Conference on Distributed Computing Systems	ICDCS	2018	industry track paper	Distributed Computing	A	https://ieeexplore.ieee.org/document/8416368/	Biplob Debnath , Mohiuddin Solaimani , Muhammad Ali Gulzar Gulzar , Nipun Arora , Cristian Lumezanu , JianWu Xu , Bo Zong , Hui Zhang , Guofei Jiang , Latifur Khan	LogLens: A Real-Time Log Analysis System	Administrators of most user-facing systems depend on periodic log data to get an idea of the health and status of production applications. Logs report information, which is crucial to diagnose the root cause of complex problems. In this paper, we present a real-time log analysis system called LogLens that automates the process of anomaly detection from logs with no (or minimal) target system know…	In this paper, we present a real-time log analysis system called LogLens that automates the process of anomaly detection from logs with no (or minimal) target system knowledge and user specification.	Administrators of most user-facing systems depend on periodic log data to get an idea of the health and status of production applications. Logs report information, which is crucial to diagnose the root cause of complex problems.	In LogLens , we employ unsupervised machine learning based techniques to discover patterns in application logs, and then leverage these patterns along with the real-time log parsing for designing advanced log analytics applications. Compared to the existing systems which are primarily limited to log indexing and search capabilities, LogLens presents an extensible system for supporting both statel…	Currently, LogLens is running at the core of a commercial log analysis solution handling millions of logs generated from the large-scale industrial environments and reported up to 12096x man-hours reduction in troubleshooting operational problems compared to the manual approach.	Debnath_2018						1
International Conference on Software Analysis, Evolution, and Reengineering	SANER	2018	research track paper	Computer Software	C	https://ieeexplore.ieee.org/document/8330208/	Maikel Leemans , Wil M. P. van der Aalst , Mark G. J. van den Brand	Recursion aware modeling and discovery for hierarchical software event log analysis	This paper presents 1) a novel hierarchy and recursion extension to the process tree model; and 2) the first, recursion aware process model discovery technique that leverages hierarchical information in event logs, typically available for software systems. This technique allows us to analyze the operational processes of software systems under real-life conditions at multiple levels of granularity…
Journal of Systems and Software	JSS	2018	journal	Computer Software Information Systems	A	https://www.scopus.com/inward/record.url?eid=2-s2.0-85047805628&partnerID=40&md5=64fc17972df185f35ce3b739216a7188	Bao L., Li Q., Lu P., Lu J., Ruan T., Zhang K.	Execution anomaly detection in large-scale systems through console log analysis	Execution anomaly detection is important for development, maintenance and performance tuning in large-scale systems. System console logs are the significant source of troubleshooting and problem diagnosis. However, manually inspecting logs to detect anomalies is unfeasible due to the increasing volume and complexity of log files. Therefore, this is a substantial demand for automatic anomaly detec…	In this paper, we propose a general method to mine console logs to detect system problems.	Execution anomaly detection is important for development, maintenance and performance tuning in large-scale systems. System console logs are the significant source of troubleshooting and problem diagnosis. However, manually inspecting logs to detect anomalies is unfeasible due to the increasing volume and complexity of log files. Therefore, this is a substantial demand for automatic anomaly detec…	We first give some formal definitions of the problem, and then extract the set of log statements in the source code and generate the reachability graph to reveal the reachable relations of log statements. After that, we parse the log files to create log messages by combining information about log statements with information retrieval techniques. These messages are grouped into execution traces ac…	Experiments on a CloudStack testbed and a Hadoop production system show that our method can effectively detect running anomalies in comparison with existing four detection algorithms.	Bao_2018						1
Journal of Systems and Software	JSS	2018	journal	Computer Software Information Systems	A	https://www.scopus.com/inward/record.url?eid=2-s2.0-85016586904&partnerID=40&md5=fc0d0575a6ab148fad0b060ffda87e8d	Farshchi M., Schneider J.-G., Weber I., Grundy J.	Metric selection and anomaly detection for cloud operations using log and metric correlation analysis	Cloud computing systems provide the facilities to make application services resilient against failures of individual computing resources. However, resiliency is typically limited by a cloud consumer's use and operation of cloud resources. In particular, system operations have been reported as one of the leading causes of system-wide outages. This applies specifically to DevOps operations, such as…	We address this problem by proposing a novel approach to detect errors in the execution of these kinds of operations, in particular for rolling upgrade operations.	Cloud computing systems provide the facilities to make application services resilient against failures of individual computing resources. However, resiliency is typically limited by a cloud consumer's use and operation of cloud resources. In particular, system operations have been reported as one of the leading causes of system-wide outages. This applies specifically to DevOps operations, such as…	Our regression-based approach leverages the correlation between operations’ activity logs and the effect of operation activities on cloud resources. First, we present a metric selection approach based on regression analysis. Second, the output of a regression model of selected metrics is used to derive assertion specifications, which can be used for runtime verification of running operations. We …		Farshchi_2018						1
Computer Engineering		2006			?	http://en.cnki.com.cn/Article_en/CJFDTOTAL-JSJC200622023.htm		Design and implementation of log audit system.
Computer Knowledge and Technology		2010			?	http://en.cnki.com.cn/Article_en/CJFDTOTAL-DNZS201022018.htm		Research on Hadoop-based network log analysis system [J]
Computer Software		2010			?	https://www.scopus.com/inward/record.url?eid=2-s2.0-78650823768&partnerID=40&md5=1b9a991f68322a60dae7cbdebd580550	Goto, J., Takada, H., Honda, S., Nagao, T.	Visualization tool for trace log: TraceLogVisualizer (TLV)
European Conference on Information Warfare and Security , ECIW		2005			?	https://www.scopus.com/inward/record.url?eid=2-s2.0-84873882664&partnerID=40&md5=61294af7c57dfb7a97a38c4ae0f339eb	Mee, V., Sutherland, I.	Windows event logs and their forensic usefulness
ICIC Express Letters		2017			?	https://www.scopus.com/inward/record.url?eid=2-s2.0-85007294777&partnerID=40&md5=6718599dc0d7279ee7163a61d516adc0	Chan-In, P., Wongthai, W.	Performance improvement considerations of cloud logging systems
ICIC Express Letters		2016			?	https://www.scopus.com/inward/record.url?eid=2-s2.0-84956990947&partnerID=40&md5=348a8f8ab17a1ea48a25dc8ccb56cb20	Wongthai, W., Van Moorsel, A.	Performance measurement of logging systems in infrastructure as a service cloud
ICIC Express Letters, Part B: Applications		2014			?	https://www.scopus.com/inward/record.url?eid=2-s2.0-84893206393&partnerID=40&md5=f9729ef551c2f5014c687a4196841eda	Hong, Y.R., Kim, D.	Implementation of an advanced method for auditing web application server logs using access record
Indonesian Journal of Electrical Engineering and Computer Science		2018			?	https://www.scopus.com/inward/record.url?eid=2-s2.0-85041112640&partnerID=40&md5=990f7708ad595e8b659bb742d39ddc56	Rastogi, R., Nahata, S., Ghuli, P., Pratiba, D., Shobha, G.	Anomaly detection in log records
International Conference on Parallel and Distributed Computing and Systems		2008			?	https://www.scopus.com/inward/record.url?eid=2-s2.0-74549200861&partnerID=40&md5=29eda1c2e41c8bfefa967b292558d31f	Solano-Quinde, L.D., Bode, B.M.	RAS and Job log data analysis for failure prediction for the IBM Blue Gene/L
International Conference on Software Engineering and Data Engineering, SEDE		2012			?	https://www.scopus.com/inward/record.url?eid=2-s2.0-84871983900&partnerID=40&md5=6903a73f1bc3331a5121fadda935fa44	Rabidas, S., Kumar, J., Das, S., Ghosh, D., Debnath, N.	Towards forensic readiness and homogeneity of operating system logs
International Journal of Advancements in Computing Technology		2012			?	https://www.scopus.com/inward/record.url?eid=2-s2.0-84859813028&partnerID=40&md5=b7908417df7f1dfe983b4e318686acc5	Jia, Z., Gong, Z., Wei, Z., Zhang, J., Luo, S., Xin, Y.	A distributed method on web log sequential pattern mining
International Journal of Embedded Systems		2018			?	https://www.scopus.com/inward/record.url?eid=2-s2.0-85051002788&partnerID=40&md5=dc830f4b9ee0dc6fe5efa84a19583bc2	Benkhelifa, E., Thomas, B.E., Tawalbeh, L., Jararweh, Y.	A framework and a process for digital forensic analysis on smart phones with multiple data logs
Jisuanji GongchengComputer Engineering		2002			?	https://www.scopus.com/inward/record.url?eid=2-s2.0-0036122397&partnerID=40&md5=dc3ca470cdf45005e06f9269eaa81eaa	Jiang, Y., Tian, S.	Research on data mining to system log audit information in IDS
Jisuanji GongchengComputer Engineering		2002			?	https://www.scopus.com/inward/record.url?eid=2-s2.0-0036619061&partnerID=40&md5=b21162adf72df5ba62912708d74dc835	Li, C., Wang, W., Cheng, L., Wang, W., Li, J.	Study and implementation of network security audit system based on firewall log
Jisuanji GongchengComputer Engineering		2003			?	https://www.scopus.com/inward/record.url?eid=2-s2.0-0242657322&partnerID=40&md5=bada22384462244fc8602468a7c1cd88	Lin, H., Dou, M.	Secure defense of system log
Jisuanji XuebaoChinese Journal of Computers		2014			?	https://www.scopus.com/inward/record.url?eid=2-s2.0-84893571517&partnerID=40&md5=9675448fad7f15ac075cc159cd00b951	Gao, Y., Zhou, W., Han, J.-Z., Meng, D.	An online log anomaly detection method based on grammar compression
Jisuanji Yanjiu yu FazhanComputer Research and Development		2013			?	https://www.scopus.com/inward/record.url?eid=2-s2.0-84877297264&partnerID=40&md5=dd8d675d723abe3ccded8f674e16b08d	Wang, N., Han, J., Fang, J.	A log anomaly detection algorithm for debugging based on grammar-based codes
Journal of Hebei University(Natural Science Edition)		2005			?	http://en.cnki.com.cn/Article_en/CJFDTOTAL-HBDD200502019.htm		Data Preparation for Web Log Mining [J]
		2005			?	http://en.cnki.com.cn/Article_en/CJFDTotal-BJGY200504007.htm		Data preprocess in Web log mining [J]
		2006			?	http://en.cnki.com.cn/Article_en/CJFDTOTAL-CQSF200604010.htm		Research on Application of Web Log Mining Technology [J]
		2002			?	http://en.cnki.com.cn/Article_en/CJFDTOTAL-JSJC200207108.htm		Research and Application of Web Log Mining [J]
		2004			?	http://en.cnki.com.cn/Article_en/CJFDTOTAL-JSJY200406019.htm		An information mining method on web log
		2006			?	http://en.cnki.com.cn/Article_en/CJFDTOTAL-JSJZ200610028.htm		A Distributed Web Log Mining System Based on Mobile Agent Technology [J]
		2007			?	http://en.cnki.com.cn/Article_en/CJFDTOTAL-SJSJ200710034.htm		Research on data preprocessing technology in web log mining
		2008			?	http://en.cnki.com.cn/Article_en/CJFDTotal-TYGY200802002.htm		Research on Method for Session Identification in Web Log Mining
		2007			?	http://en.cnki.com.cn/Article_en/CJFDTOTAL-WJFZ200708005.htm		Research on Data Preprocessing Technology in Web Log Mining [J]
		2009			?	http://en.cnki.com.cn/Article_en/CJFDTOTAL-WJFZ200911038.htm		Research and Design Web-Based Security Audit Log System [J]
		2004			?	http://manu44.magtech.com.cn/Jwk_infotech_wk3/EN/abstract/abstract1414.shtml		The Function of Log Analysis in Network Security
International Conference on Automated Software Engineering	ASE	2019	research track paper		A	https://ieeexplore.ieee.org/abstract/document/8952375?	Ren, Z., Liu, C., Xiao, X., Jiang, H., & Xie, T.	Root cause localization for unreproducible builds via causality analysis over system call tracing	Localization of the root causes for unreproducible builds during software maintenance is an important yet challenging task, primarily due to limited runtime traces from build processes and high diversity of build environments. To address these challenges, in this paper, we propose RepTrace, a framework that leverages the uniform interfaces of system call tracing for monitoring executed build comm…	we propose RepTrace, a framework that leverages the uniform interfaces of system call tracing for monitoring executed build commands in diverse build environments and identifies the root causes for unreproducible builds by analyzing the system call traces of the executed build commands.	Localization of the root causes for unreproducible builds during software maintenance is an important yet challenging task, primarily due to limited runtime traces from build processes and high diversity of build environments.	Specifically, from the collected system call traces, RepTrace performs causality analysis to build a dependency graph starting from an inconsistent build artifact (across two builds) via two types of dependencies: read/write dependencies among processes and parent/child process dependencies, and searches the graph to find the processes that result in the inconsistencies. To address the challenges…	The evaluation results of RepTrace over a set of real-world software packages show that RepTrace effectively finds not only the root cause commands responsible for the unreproducible builds, but also the files to patch for addressing the unreproducible issues. Among its Top-10 identified commands and files, RepTrace achieves high accuracy rate of 90.00% and 90.56% in identifying the root causes, …	ren_2019								1
Joint Meeting on European Software Engineering Conference and Symposium on the Foundations of Software Engineering	FSE	2019	research track paper		A*	https://dl.acm.org/doi/abs/10.1145/3338906.3338931	Zhang, X., Xu, Y., Lin, Q., Qiao, B., Zhang, H., Dang, Y., ... & Chen, J.	Robust log-based anomaly detection on unstable log data	Logs are widely used by large and complex software-intensive systems for troubleshooting. There have been a lot of studies on log-based anomaly detection. To detect the anomalies, the existing methods mainly construct a detection model using log event data extracted from historical logs. However, we find that the existing methods do not work well in practice. These methods have the close-world as…	In this paper, we propose a new log-based anomaly detection approach, called LogRobust.	Logs are widely used by large and complex software-intensive systems for troubleshooting. There have been a lot of studies on log-based anomaly detection. To detect the anomalies, the existing methods mainly construct a detection model using log event data extracted from historical logs. However, we find that the existing methods do not work well in practice. These methods have the close-world as…	LogRobust extracts semantic information of log events and represents them as semantic vectors. It then detects anomalies by utilizing an attention-based Bi-LSTM model, which has the ability to capture the contextual information in the log sequences and automatically learn the importance of different log events. In this way, LogRobust is able to identify and handle unstable log events and sequence…	The experimental results show that the proposed approach can well address the problem of log instability and achieve accurate and robust results on real-world, ever-changing log data.	zhang_2019						1
International Conference on Software Engineering	ICSE	2019	research track paper		A*	https://ieeexplore.ieee.org/abstract/document/8811945	Li, Z., Chen, T. H., Yang, J., & Shang, W.	DLFinder: Characterizing and detecting duplicate logging code smells	Developers rely on software logs for a wide variety of tasks, such as debugging, testing, program comprehension, verification, and performance analysis. Despite the importance of logs, prior studies show that there is no industrial standard on how to write logging statements. Recent research on logs often only considers the appropriateness of a log as an individual item (e.g., one single logging …	In this paper, we focus on studying duplicate logging statements, which are logging statements that have the same static text message. Such duplications in the text message are potential indications of logging code smells, which may affect developers' understanding of the dynamic view of the system.	Developers rely on software logs for a wide variety of tasks, such as debugging, testing, program comprehension, verification, and performance analysis. Despite the importance of logs, prior studies show that there is no industrial standard on how to write logging statements. Recent research on logs often only considers the appropriateness of a log as an individual item (e.g., one single logging …	We manually studied over 3K duplicate logging statements and their surrounding code in four large-scale open source systems: Hadoop, CloudStack, ElasticSearch, and Cassandra. We uncovered five patterns of duplicate logging code smells. For each instance of the code smell, we further manually identify the problematic (i.e., require fixes) and justifiable (i.e., do not require fixes) cases. Then, w…	In total, combining the results of DLFinder and our manual analysis, we reported 82 problematic code smell instances to developers and all of them have been fixed.	li_2019			1
Empirical Software Engineering		2019	journal		A	https://link.springer.com/article/10.1007/s10664-019-09687-9	Zeng, Y., Chen, J., Shang, W., & Chen, T. H. P.	Studying the characteristics of logging practices in mobile apps: a case study on f-droid	Logging is a common practice in software engineering. Prior research has investigated the characteristics of logging practices in system software (e.g., web servers or databases) as well as desktop applications. However, despite the popularity of mobile apps, little is known about their logging practices. In this paper, we sought to study logging practices in mobile apps. In particular, we conduc…	we conduct a case study on 1,444 open source Android apps in the F-Droid repository.	Prior research has investigated the characteristics of logging practices in system software (e.g., web servers or databases) as well as desktop applications. However, despite the popularity of mobile apps, little is known about their logging practices.			zeng_2019	1
International Conference on Software Maintenance and Evolution	ICSME	2019	research track paper		A	https://ieeexplore.ieee.org/abstract/document/8919133	Zhi, Chen, Jianwei Yin, Shuiguang Deng, Maoxin Ye, Min Fu, and Tao Xie	An exploratory study of logging configuration practice in Java	Logging components are an integral element of software systems. These logging components receive the logging requests generated by the logging code and process these requests according to logging configurations. Logging configurations play an important role on the functionality, performance, and reliability of logging. Although recent research has been conducted to understand and improve current …	To fill this gap, we conduct an exploratory study on logging configuration practice of 10 open-source projects and 10 industrial projects written in Java in various sizes and domains.	Although recent research has been conducted to understand and improve current practice on logging code, no existing research focuses on logging configurations.			zhi_2019	1
Empirical Software Engineering		2019	journal		A	https://link.springer.com/article/10.1007/s10664-019-09757-y	Li, Shanshan, Xu Niu, Zhouyang Jia, Xiangke Liao, Ji Wang, and Tao Li	Guiding log revisions by learning from software evolution history	Despite the importance of log statements in postmortem debugging, developers are difficult to establish good logging practices. There are mainly two reasons. First, there are no rigorous specifications or systematic processes to instruct logging practices. Second, logging code evolves with bug fixes or feature updates. Without considering the impact of software evolution, previous works on log en…	To fill this gap, this paper proposes to guide log revisions by learning from evolution history.	Despite the importance of log statements in postmortem debugging, developers are difficult to establish good logging practices. There are mainly two reasons. First, there are no rigorous specifications or systematic processes to instruct logging practices. Second, logging code evolves with bug fixes or feature updates. Without considering the impact of software evolution, previous works on log en…	Motivated by code clones, we assume that logging code with similar context is pervasive and deserves similar modifications and conduct an empirical study on 12 open-source projects to validate our assumption. Upon this, we design and implement LogTracker, an automatic tool that learns log revision rules by mining the correlation between logging context and modifications and recommends candidate l…	Our experiments show that LogTracker can detect 369 instances of candidates when applied to the latest versions of software. So far, we have reported 79 of them, and 52 have been accepted.	li_2019_emse			1
IEEE Transactions on Software Engineering		2019	journal		A*	https://ieeexplore.ieee.org/abstract/document/8840982	Liu, Zhongxin, Xin Xia, David Lo, Zhenchang Xing, Ahmed E. Hassan, and Shanping Li	Which variables should i log?	Developers usually depend on inserting logging statements into the source code to collect system runtime information. Such logged information is valuable for software maintenance. A logging statement usually prints one or more variables to record vital system status. However, due to the lack of rigorous logging guidance and the requirement of domain-specific knowledge, it is not easy for develope…	we propose an approach to recommend logging variables for developers during development by learning from existing logging statements.	However, due to the lack of rigorous logging guidance and the requirement of domain-specific knowledge, it is not easy for developers to make proper decisions about which variables to log.	Different from other prediction tasks in software engineering, this task has two challenges: 1) Dynamic labels -- different logging statements have different sets of accessible variables, which means in this task, the set of possible labels of each sample is not the same. 2) Out-of-vocabulary words -- identifiers' names are not limited to natural language words and the test set usually contains a…	We evaluate our approach on 9 large and high-quality Java projects. Our evaluation results show that the average MAP of our approach is over 0.84, outperforming random guess and an information-retrieval-based method by large margins.	liu_2019			1
International Conference on Software Maintenance and Evolution	ICSME	2019	research track paper		A	https://ieeexplore.ieee.org/abstract/document/8919094	Anu, Han, Jie Chen, Wenchang Shi, Jianwei Hou, Bin Liang, and Bo Qin	An Approach to Recommendation of Verbosity Log Levels Based on Logging Intention	Verbosity levels of logs are designed to discriminate highly diverse runtime events, which facilitates system failure identification through simple keyword search (e.g., fatal, error). Verbosity levels should be properly assigned to logging statements, as inappropriate verbosity levels would confuse users and cause a lot of redundant maintenance effort. However, to achieve such a goal is not an e…	we propose an automatic approach to help developers determine the appropriate verbosity log levels.	Verbosity levels should be properly assigned to logging statements, as inappropriate verbosity levels would confuse users and cause a lot of redundant maintenance effort. However, to achieve such a goal is not an easy task due to the lack of practical specifications and guidelines towards verbosity log level usages. The existing research has built a classification model on log related quantitativ…	More specially, our approach discriminates different verbosity log level usages based on code context features that contain underlying logging intention.	Evaluation results show that VerbosityLevelDirector achieves high performance on verbosity level discrimination and outperforms the baseline approaches on all those projects. Furthermore, through applying noise handling technique, our approach can detect previously unknown inappropriate verbosity level configurations in the code repository. We have reported 21 representative logging level errors …	anu_2019			1
International Joint Conference on Artificial Intelligence	IJCAI	2019	research track paper		A*	https://www.researchgate.net/publication/334843942_LogAnomaly_Unsupervised_Detection_of_Sequential_and_Quantitative_Anomalies_in_Unstructured_Logs	Meng, Weibin, Ying Liu, Yichen Zhu, Shenglin Zhang, Dan Pei, Yuqing Liu, Yihao Chen et al	LogAnomaly: Unsupervised Detection of Sequential and Quantitative Anomalies in Unstructured Logs	Recording runtime status via logs is common for almost every computer system, and detecting anomalies in logs is crucial for timely identifying malfunctions of systems. However, manually detecting anomalies for logs is time-consuming, error-prone, and infeasible. Existing automatic log anomaly detection approaches, using indexes rather than semantics of log templates, tend to cause false alarms. …					meng_2019						1
International Conference on Software Engineering	ICSE	2019	industry track paper		A*	https://dl.acm.org/doi/10.1109/ICSE-SEIP.2019.00021	Zhu, J., He, S., Liu, J., He, P., Xie, Q., Zheng, Z., & Lyu, M. R.	Tools and benchmarks for automated log parsing	Logs are imperative in the development and maintenance process of many software systems. They record detailed runtime information that allows developers and support engineers to monitor their systems and dissect anomalous behaviors and errors. The increasing scale and complexity of modern software systems, however, make the volume of logs explodes. In many cases, the traditional way of manual log…					zhu_2019				1
International Conference on Data Engineering	ICDE	2019	research track paper		A*	https://ieeexplore.ieee.org/abstract/document/8731527	Agrawal, Amey, Rohit Karlupia, and Rajat Gupta	Logan: A distributed online log parser	Logs serve as a critical tool for debugging and monitoring applications. However, gaining insights from unstructured logs is difficult. Hence, many log management and analysis applications first parse logs into structured templates. In this paper, we train a data-driven log parser on our new Apache Spark dataset, the largest application log dataset yet. We implement a distributed online algorithm…					agrawal_2019				1
International Conference on Automated Software Engineering	ASE	2019	research track paper		A	https://ieeexplore.ieee.org/abstract/document/8952406	Liu, J., Zhu, J., He, S., He, P., Zheng, Z., & Lyu, M. R.	Logzip: extracting hidden structures via iterative clustering for log compression	System logs record detailed runtime information of software systems and are used as the main data source for many tasks around software engineering. As modern software systems are evolving into large scale and complex structures, logs have become one type of fast-growing big data in industry. In particular, such logs often need to be stored for a long time in practice (e.g., a year), in order to …					liu_2019_logzip					1
